1  
2  
3  
4 **Cryo-EM Structures Delineate a pH-Dependent Switch**  
5 **that Mediates Endosomal Positioning of SARS-CoV-2**  
6 **Spike Receptor-Binding Domains**  
7

8 Tongqing Zhou<sup>1,7</sup>, Yaroslav Tsybovsky<sup>2,7</sup>, Adam S. Olia<sup>1,7</sup>, Jason Gorman<sup>1</sup>, Micah Rapp<sup>3</sup>, Gabriele  
9 Cerutti<sup>3</sup>, Gwo-Yu Chuang<sup>1</sup>, Phinikoula S. Katsamba<sup>3</sup>, Alexandra Nazzari<sup>1</sup>, Jared M. Sampson<sup>3,6</sup>,  
10 Arne Schön<sup>4</sup>, Pengfei Wang<sup>5</sup>, Jude Bimela<sup>3</sup>, Wei Shi<sup>1</sup>, I-Ting Teng<sup>1</sup>, Baoshan Zhang<sup>1</sup>, Jeffrey C.  
11 Boyington<sup>1</sup>, Mallika Sastry<sup>1</sup>, Tyler Stephens<sup>2</sup>, Jonathan Stuckey<sup>1</sup>, Shuishu Wang<sup>1</sup>, Richard A.  
12 Friesner<sup>6</sup>, David D. Ho<sup>5</sup>, John R. Mascola<sup>1</sup>, Lawrence Shapiro<sup>1,3,5\*</sup>, Peter D. Kwong<sup>1,3,8\*</sup>  
13

14 <sup>1</sup> Vaccine Research Center, National Institute of Allergy and Infectious Diseases, National  
15 Institutes of Health, Bethesda, MD 20892, USA

16 <sup>2</sup> Electron Microscopy Laboratory, Cancer Research Technology Program, Leidos Biomedical  
17 Research, Inc., Frederick National Laboratory for Cancer Research, Frederick, MD 21702, USA

18 <sup>3</sup> Department of Biochemistry and Molecular Biophysics, Columbia University, New York, NY  
19 10032, USA

20 <sup>4</sup> Department of Biology, Johns Hopkins University, Baltimore, MD, 21218, USA

21 <sup>5</sup> Aaron Diamond AIDS Research Center, Columbia University Vagelos College of Physicians and  
22 Surgeons, New York, NY 10032, USA

23 <sup>6</sup> Department of Chemistry, Columbia University, New York, NY 10027, USA

24 <sup>7</sup> These authors contributed equally

25 <sup>8</sup> Lead Contact

26 \* Correspondence: lss8@columbia.edu (L.S.) and pdkwong@nih.gov (P.D.K.)  
27

28 **Keywords:** CR3022, immune evasion, pH-dependent switch, structural rearrangement, type 1  
29 fusion machine  
30  
31

32  
33  
34  
35  
36  
37  
38  
39  
40  
41  
42  
43  
44  
45  
46  
47  
48  
49

**ABSTRACT**

**The SARS-CoV-2 spike employs mobile receptor-binding domains (RBDs) to engage the ACE2 receptor and to facilitate virus entry. Antibodies can engage RBD but some, such as CR3022, fail to inhibit entry despite nanomolar spike affinity. Here we show the SARS-CoV-2 spike to have low unfolding enthalpy at serological pH and up to 10-times more unfolding enthalpy at endosomal pH, where we observe significantly reduced CR3022 affinity. Cryo-EM structures –at serological and endosomal pH– delineated spike recognition of up to three ACE2 molecules, revealing RBD to freely adopt the ‘up’ conformation. In the absence of ACE2, single-RBD-up conformations dominated at pH 5.5, resolving into a locked all-down conformation at lower pH. Notably, a pH-dependent refolding region (residues 824-858) at the spike-interdomain interface displayed dramatic structural rearrangements and mediated RBD positioning and spike shedding of antibodies like CR3022. An endosomal mechanism involving spike-conformational change can thus facilitate immune evasion from RBD-‘up’-recognizing antibody.**

50

51

52

53 **Highlights**

- 54 • Reveal spike at serological pH to have only ~10% the unfolding enthalpy of a typical  
55 globular protein, explaining how antibodies like CR3022 can bind with avidity  
56
- 57 • Define an endosomal mechanism whereby spike binds ACE2, but sheds CR3022, enabling  
58 immune evasion from potentially neutralizing antibody  
59
- 60 • Determine cryo-EM structures of the SARS-CoV-2 spike along its endosomal entry pathway -  
61 at pH 5.5, 4.5, and 4.0, and in complexes with ACE2 receptor at pH 7.4 and 5.5  
62
- 63 • Show spike to exclusively adopt an all RBD-down conformation at the low pH of the late  
64 endosome-early lysosome  
65
- 66 • Reveal structural basis by which a switch domain mediates RBD position in response to pH  
67  
68

## 69 **Introduction**

70           The SARS-CoV-2 spike is a type 1 fusion machine, responsible for virus-cell entry via  
71 ACE2-receptor interactions (Lan et al., 2020; Shang et al., 2020b; Wang et al., 2020; Zhou et al.,  
72 2020a). Entry occurs both endosomally and at the cell surface, with inhibition of the endosomal  
73 cathepsin L and the cell-surface TMPRSS2 required to fully inhibit entry (Hoffmann et al., 2020;  
74 Ou et al., 2020); cleavage of the spike by furin can also occur, but furin cleavage does not appear  
75 to be essential for entry and occurs distal from the fusion peptide. Cryo-EM structures reveal two  
76 prevalent conformations for uncleaved and furin-cleaved SARS-CoV-2 spikes (Walls et al., 2020;  
77 Wrapp et al., 2020; Wrobel et al., 2020): a single-up conformation and an all-down conformation,  
78 related to the positioning of the receptor-binding domains (RBDs). The ‘up’ positioning of RBD is  
79 required for interaction with ACE2 receptor and is also related to the epitope availability of RBD-  
80 directed antibodies.

81           Potent neutralizing antibodies have been identified that target RBD, and in some cases their  
82 structures with spike or RBD have been determined (Barnes et al., 2020; Cao et al., 2020; Hansen  
83 et al., 2020; Ju et al., 2020; Liu et al., 2020; Shi et al., 2020; Walls et al., 2019; Wu et al., 2020).  
84 Other RBD-directed antibodies, such as antibody CR3022 (ter Meulen et al., 2006), however, have  
85 been shown to bind spike with high affinity, yet fail to inhibit SARS-CoV-2 entry (Yuan et al.,  
86 2020). This high affinity for the spike trimer, yet lack of virus neutralization, suggests a spike-  
87 based mechanism to evade potentially neutralizing antibody. Reports of antibody CR3022  
88 disassembling spike (Huo et al., 2020), moreover, suggest unusual spike fragility.

89           As antibody-bound disassembled spikes seemed unlikely to be capable of inducing direct  
90 virus entry, we explored endosomal entry and carried out biophysical and structural studies of the  
91 SARS-CoV-2 spike along its endosomal entry pathway. We measured the unfolding enthalpy of

92 the spike as well as its binding to CR3022 antibody and to ACE2 receptor as a function of pH. We  
93 determined cryo-EM structures of the spike, alone and in complex with ACE2 receptor, at  
94 serological and endosomal pH. We delineate the molecular mechanism that mediates positioning  
95 of RBDs, highlighting the key role of a refolding region with multiple aspartic acid residues, a pH-  
96 dependent switch, which when protonated locks RBDs in the down position. Overall, our findings  
97 provide a pH-dependent mechanism of conformational masking, whereby reduced folding at  
98 serological pH underlies the ease by which antibodies like CR3022 bind to spike and their  
99 prevalent elicitation. ACE2 recognition and endosomal entry, however, result in reduction of pH  
100 and induction of antibody shedding through structural rearrangements of the spike mediated by the  
101 pH-dependent switch.

102

## 103 **Results**

### 104 **Spike at serological pH is at a minimum of unfolding enthalpy**

105 To provide insight into the stability of the spike over the course of virus-cell endosomal  
106 entry, we used differential scanning calorimetry (DSC) to measure the unfolding enthalpy of the  
107 soluble trimeric ectodomain (spike), which included GSAS and PP mutations and the T4 phage  
108 fibritin trimerization domain (Wrapp et al., 2020), as a function of pH. Notably, at serological pH  
109 (pH 7.4) we observed spike to be at a minimum of unfolding enthalpy (73 kcal/mol) or ~10% the  
110 normalized unfolding enthalpy of the average globular protein (Robertson and Murphy, 1997)  
111 (**Figure 1A, left**). The amount of folding energy strengthened rapidly as pH dropped, increasing  
112 ~10-fold at pH 6 before decreasing as pH reduced further. Analysis of melting curves (**Figure 1A,**  
113 **right**) indicated three distinct peaks: a peak at ~48°C, which dominated under basic conditions and  
114 decreased at acidic conditions; a peak at ~65°C, which was barely present at serological pH, but

115 rapidly increased to dominate as pH dropped to 5.5-6.0; and a peak at ~55°C, which first appeared  
116 as a shoulder at pH 6, but then increased to dominate and shifted to lower temperature at pH lower  
117 than 5.5.

118 In sharp contrast to spike, analysis of the spike N-terminal domain (NTD) and RBD as  
119 separate proteins indicated each of them to have typical unfolding enthalpies (>90% that of the  
120 average normalized globular protein) (**Figure S1**).

121 To understand how the reduced folding enthalpy might influence spike structure, we used  
122 negative stain-electron microscopy (EM) to visualize the spike as a function of pH (**Figure S2**). At  
123 pH 7.4, we observed only a few ordered spikes. However, when pH decreased, we observed the  
124 quantity of well-formed trimers to increase substantially; these showed some clustering at pH 5.5-  
125 6.0 before resolving into separate particles at pH 4.0-4.5. Overall, we observed concordance  
126 between the presence of well-formed trimers and folding enthalpy measured by DSC, with only a  
127 few ordered trimers at serological pH and substantially increased well-formed trimers at  
128 endosomal pH.

129

### 130 **Binding of ACE2 receptor and CR3022 antibody at serological and endosomal pH**

131 For variation in pH over the course of virus entry to impact the binding of antibody, the  
132 antibody would need to allow spike recognition of the ACE2 receptor, thereby enabling the virus  
133 to initiate endosomal entry. CR3022 has been shown to not inhibit RBD binding to ACE2 (Yuan et  
134 al., 2020), but this has not been shown with spike. We used isothermal titration calorimetry (ITC)  
135 to determine whether binding of CR3022 to spike was compatible with ACE2 interaction at  
136 serological pH. We chose to use a monomeric version of ACE2 to test more sensitively the impact  
137 of antibody inhibition. First, we titrated ACE2 into soluble spike, and observed 1.9 ACE2

138 molecules to bind per spike trimer, with an affinity of 94 nM (**Figure 1B, left**). Next, we fully  
139 titrated the antigen-binding fragment (Fab) of CR3022 into soluble spike (**Figure S3A**) and further  
140 titrated ACE2 into the spike-CR3022 complex formed to observe 2.3 ACE2 molecules to bind  
141 each spike-CR3022 complex, with an affinity of 130 nM (**Figure 1B, right**). Thus, at serological  
142 pH, the SARS-CoV-2 spike appears capable of recognizing ACE2 even in the presence of antibody  
143 CR3022, indicating that CR3022-bound spikes could initiate endosomal-based ACE2-dependent  
144 entry.

145 To gain insight into the impact of endosomal pH on ACE2 and CR3022 interactions with  
146 spike, we characterized their binding to both spike and RBD, expressed as a separate molecule. For  
147 these experiments, we chose to use dimeric ACE2 to more closely mimic native interactions with  
148 spike. Endosomes vary in pH from pH ~6 (early endosomes) to pH ~5 (late endosomes), with  
149 lysosomal pH as low as ~4 (Benjaminsen et al., 2011; Turk and Turk, 2009). For endosomal pH,  
150 we chose to measure pH 5.5 and 4.5. At endosomal pH, surface plasmon resonance (SPR)-  
151 determined apparent ACE2 binding affinities to both spike and RBD were somewhat reduced from  
152 0.82 nM at serological pH to 8.4 and 7.0 nM at pH 5.5 and 4.5, respectively, for spike, and from  
153 1.0 nM at serological pH to 2.2 and 15. nM at pH 5.5 and 4.5, respectively, for RBD (**Figure S3B**).  
154 With CR3022 IgG, apparent affinities to spike and RBD were sub-nanomolar at serological pH,  
155 though with a 10-fold difference (0.49 and 0.052 nM to spike and RBD, respectively) (**Figure 1C**).  
156 At pH 5.5, this 10-fold difference was retained (1.7 and 0.23 nM, respectively). However, at pH  
157 4.5, CR3022 still bound to RBD (1.1 nM), but its apparent affinity to spike was dramatically  
158 reduced with a  $K_D > 1000$  nM – an apparent affinity difference we estimate to be >1000-fold  
159 (**Figures 1C and S3C**). Because CR3022 still bound strongly to the isolated RBD, we attribute the

160 dramatically reduced apparent affinity of CR3022 for spike at low pH to conformational  
161 constraints of the spike (**Figure 1D**).

162

### 163 **Cryo-EM structures of SARS-CoV-2 spike with ACE2 at serological and endosomal pH**

164 Structures of ACE2 and CR3022 have been determined in complex with RBD as a separate  
165 domain (Lan et al., 2020; Shang et al., 2020b; Wang et al., 2020; Yuan et al., 2020), but less is  
166 known about their interactions with trimer. While negative-stain images of soluble ACE2 with  
167 spike showed fewer ordered spike complexes at serological pH versus lower pH (**Figure S2**), we  
168 judged the spike to be sufficiently ordered to permit residue-level structural analysis at pH 7.4. To  
169 provide structural insight into the recognition between ACE2 and spike trimer, we mixed soluble  
170 ACE2 with spike trimer at a 6:1 molar ratio at pH 7.4 and collected single-particle cryo-EM data  
171 on a Titan Krios. We obtained structures at 3.6-3.9 Å resolution and observed spike to bind ACE2  
172 at stoichiometries of 1:1, 1:2, and 1:3, with prevalences of 15%, 43%, and 38%, respectively  
173 (**Figure 2A, Table S1**). While the membrane-proximal region of the spike in these complexes  
174 remained 3-fold symmetric, the ACE2-binding regions showed asymmetry with, for example,  
175 superposition of the double-ACE2-bound complex onto itself based on membrane-proximal  
176 regions leading to displacement of ACE2 molecules by almost 13 Å (**Figure 2B**). However, we  
177 could see no evidence of coordinated movement, with the RBD domain on each protomer  
178 appearing to engage ACE2 without significantly impacting the up (or down) positioning of the  
179 neighboring protomers. Thus, ACE2-receptor engagement required RBD to be in the ‘up’ position,  
180 and this did not appear to destabilize the spike nor to trigger a substantial structural rearrangement  
181 beyond raising of RBD.



182 To provide insight into the impact of endosomal pH, we again mixed soluble ACE2 with  
183 spike trimer at a 6:1 molar ratio, but this time at pH 5.5, and determined the structure of the complex  
184 using cryo-EM. Similar to serological pH, we obtained structures at 3.7-3.9 Å resolution and  
185 observed spike to bind ACE2 at stoichiometries of 1:1, 1:2, and 1:3 with prevalences of 31%, 37%,  
186 and 32%, respectively (**Figure 2C, Table S1**). We superposed triple-ACE2-bound complexes  
187 determined at pH 7.4 and pH 5.5 and observed the membrane-proximal regions of the spike to align  
188 closely, while ACE2 molecules showed displacements of 3.1, 6.0, and 10.8 Å (**Figure 2D**). Overall,  
189 structures of the spike with ACE2 showed about equal distribution of single-, double-, and triple-  
190 ACE2-bound states at both serological and endosomal pH.

191

## 192 **Ligand-free cryo-EM structures of SARS-CoV-2 spike at low pH**

193 In light of the similarity of ACE2 complexes at pH 7.4 and 5.5 (**Figure 2**) but substantial  
194 differences at these pHs observed for ligand-free spike by negative stain-EM (**Figure S2**), we  
195 analyzed the structure of the spike at pH 5.5 by single-particle cryo-EM. We determined a  
196 consensus structure from 1,083,554 particles at a resolution of 2.7 Å, in which most of the spike  
197 was well resolved, except for a lone RBD for which reconstruction density was poor (**Figures 3A**  
198 **and S5, Table S2**). Analysis of structural heterogeneity in this region (**Videos S1-S4; Figure S5C,**  
199 **panel A**) produced six 3D classes ranging in prevalence from 7% to 26% and describing three  
200 principal conformations, with the RBD in the up or down position, or without a defined position  
201 for this domain (**Figure S5C, panel B**). Interestingly, unlike for ACE2-bound complexes, no  
202 double- or triple-RBD-up conformations were observed. Two classes with prevalences of 23%  
203 (Conformation 1 – 2.9 Å resolution) and 26% (Conformation 2 – 2.9 Å resolution) corresponded to  
204 two different single RBD-up conformations. A third prevalent class representing 10% of the

205 particles had all RBDs down. For all three of these prevalent classes, unlike the consensus  
206 structure, density for all RBD domains was well resolved (**Figure S5C, panel C**), indicating  
207 multiple different orientations of RBD in the spike at pH 5.5. In the remaining classes, the RBD  
208 did not assume a defined position, suggesting RBD mobility at pH 5.5.

209 To determine how even lower pH affected conformational heterogeneity, and since  
210 CR3022 retained binding to spike at pH 5.5 but not at pH 4.5, we sought to obtain a cryo-EM  
211 structure of the ligand-free spike at even lower pH. Negative-stain EM analyses indicated a high  
212 prevalence of well-formed trimers at both pH 4.5 and 4.0, with some disorder at pH 3.6 (**Figure**  
213 **S2**). We collected cryo-EM datasets at both pH 4.5 and 4.0. Single particle analysis of the pH 4.5  
214 dataset comprising 179,973 particles resolved into an all-RBD-down conformation, and we refined  
215 this map to 2.7 Å resolution (**Figure 3B and S5, Table S3**); single particle analysis of the pH 4.0  
216 dataset comprising 911,839 particles resolved into a virtually identical all-RBD-down  
217 conformation (root-mean square deviation (rmsd) between the two structures of 0.9 Å) (**Figure 3C**  
218 **and S5**). The similarity of the pH 4.5 and pH 4.0 structures indicated spike conformational  
219 heterogeneity to be reduced between pH 5.5 and 4.5, and then to remain unchanged as pH was  
220 reduced further. The pH 4.0 map was especially well-defined at 2.4 Å resolution (**Table S3**),  
221 enabling individual water molecules to be observed (**Figure 3D**), and we chose the pH 4.0  
222 structure for comparative analysis.

223

## 224 **Refolding at spike domain interfaces underlies conformational rearrangement**

225 To identify critical components responsible for the reduction of conformational heterogeneity  
226 between pH 5.5 and lower pH and to shed light on the mechanism locking RBDs in the down  
227 position, we analyzed rmsds between the pH 5.5 structures and the all-down pH 4.0 conformation

228 with an 11-residue sliding window to identify regions that refold (**Figures 4A, top, and S6**). As each  
229 of the protomers in the trimer displayed a different conformation in each of the pH 5.5 structures, we  
230 defined protomer B as the one with RBD in the ‘up’ position in each of the single RBD-up  
231 conformations, with protomers A-C appearing counter-clockwise when viewed along the trimer 3-  
232 fold axis toward the membrane. We observed significant rmsd peaks for short stretches around  
233 residue 320 in protomer A only and around residue 525 in protomer B only, and more substantially  
234 in a region comprising residues 824-858 (**Figure S6b**). This region, which for reasons described  
235 below we named the ‘switch’ region, was fully defined in protomer B and partially resolved in  
236 protomer A (residues 824-828 and 848-858) and protomer C (residues 824-841 and 851-858).  
237 Notably, this region was almost entirely unresolved in our structures with ACE2 and in most  
238 published spike structures (**Figure 4A, bottom**), suggestive of substantial mobility.

239 The asymmetry in distribution of refolding regions in the trimer between single-up and all-  
240 down structures (**Figure 4B**) suggested the ‘up’ RBD to require concerted adjustments throughout  
241 the trimer. To delineate these, we determined angles and rigid-body translations between each of the  
242 subdomains (**Table S4**) for pH 5.5 single RBD-up and 4.0 all RBD-down structures. For clarity, we  
243 specify by subscript the protomer of each subunit or of each residue. Starting with the subdomain 1  
244 of protomer A ( $SD1_A$ ) at the entrance loop of protomer A, and moving laterally around the trimer  
245 (**Figure 4C, Video S5**), we observed slight refolding in the 313-325<sub>A</sub> stretch, allowing a 17° rotation  
246 of  $SD1_A$  to accommodate the switch region on the neighboring B protomer (switch B). At pH 5.5,  
247 switch B interacted with subdomain 2 of protomer A ( $SD2_A$ ) (buried surface area of  $\sim 300 \text{ \AA}^2$ ), and  
248 this key inter-protomer contact coupled with  $SD1_A$  rotation and 2.8-Å translation resulted in the 8.8-  
249 Å lateral displacement of N-terminal domain of protomer B ( $NTD_B$ ) towards the next RBD-switch  
250 ( $RBD_B$  and switch C). The displaced  $NTD_B$  induced consecutive shifts of  $SD2_B$  and  $SD1_B$  domains,

251 which culminated in the 22.8-Å ‘up’ translation (64.9° rotation) of RBD<sub>B</sub> versus its down-  
252 equivalent.

253 The ‘up’ positioning of RBD<sub>B</sub> was accommodated in part by a 5.1 Å mostly downwards  
254 displacement of NTD<sub>C</sub> towards the viral membrane, which – continuing to the next RBD-switch  
255 (RBD<sub>C</sub> and switch A) – induced minor shifts of SD2<sub>C</sub> and SD1<sub>C</sub> domains and yielded RBD<sub>C</sub> and  
256 switch A in conformations that closely resembled those of the all-down pH 4.0 structure.

257 At pH 4.0, each of the RBD-switches closely resembled each other. The most dramatic  
258 refolding relative to the switches at pH 5.5 occurred in switch B, where the guanidinium of residue  
259 Arg847<sub>B</sub> swivels over 25 Å from interacting in an inter-protomer manner with SD2<sub>A</sub> to interacting in  
260 an intra-protomer manner with NTD<sub>B</sub> of the same protomer. This swiveling breaks the coordinated  
261 displacements of domains across the protomer-protomer interface, reducing the SD2<sub>A</sub> interaction  
262 with switch B by half (buried surface area of ~160 Å<sup>2</sup>).

263 Notably, refolding regions were observed to reside at critical inter-protomer contacts or at  
264 key joints between domains, especially the SD2 to SD1 joint, which cradles the switch of the  
265 neighboring protomer, and the SD1<sub>B</sub> joint with up-RBD<sub>B</sub> made up of refolding residues 523-530<sub>B</sub>.

266

### 267 **A pH-dependent switch domain locks spike in down position**

268 The switch domain, which included aspartic acid residues at 830, 839, 843 and 848 and a  
269 disulfide linkage between Cys840 and Cys851, was located at the nexus of SD1 and SD2 from one  
270 protomer, and HR1 (in the S2 subunit) and NTD from the neighboring protomer. This region showed  
271 dramatic conformational changes (**Figure 5A**). Pairwise rmsd comparisons (**Figure 5B**) indicated  
272 the cryo-EM-determined switch structures to segregate into two conformations: ‘unprotonated-  
273 switches’ and ‘protonated-switches’.

274 Unprotonated-switches were exemplified by switches B and C at pH 5.5 and perhaps best by  
275 switch B in the pH 5.5 single-RBD up structure (**Figure 5A, C, left, Video S5**). Continuing from  
276 fusion peptide (FP<sub>B</sub>), the N terminus of switch B formed several helical turns (833-842), extending  
277 laterally from HR1<sub>B</sub> to SD2<sub>A</sub>. A turn (843-848) provided extensive contacts with SD2<sub>A</sub>, before  
278 returning in helical turns (849-855) back to HR1<sub>B</sub>. Unprotonated-switches were stabilized by a  
279 hydrophobic core comprising the disulfide and residues Phe833, Tyr837, Ala846, Leu849, and  
280 Phe855 (**Figure 5C, left**). Notably, all four of the unprotonated-switch aspartic acids faced solvent  
281 and appeared to be negatively charged.

282 Protonated-switches were exemplified by switch A at pH 5.5 and by all switches at pH 4.0  
283 including switch B in the pH 4.0 structure (**Figure 5A, C right, Video S5**). These switches  
284 reoriented their N-terminal helical turns to point towards SD1, swiveling the C $\alpha$ -position of Arg847  
285 over 15 Å to interact with NTD (**Figure 5C and Table S5**) before finishing the rest of the domain  
286 with a few helical turns (848-855). Protonated switches were stabilized by a hydrophobic core  
287 comprising Tyr837, Ile850, and aliphatic portions of the side chain from Lys854 on one side of the  
288 disulfide and Ala846 and Phe855 on the other. Notably, two of the switch domain Asp residues that  
289 appeared most likely to be protonated based on hydrogen bonding patterns in the pH 4.0 structure  
290 (D830 and D843) also had higher calculated pK<sub>a</sub>s compared to the unprotonated switch  
291 conformation, consistent with their observed hydrogen bonds and their apparent protonation at pH  
292 5.5 (**Figure 6**). Additionally, three Asp residues from the neighboring protomer (D574, D586, and  
293 D614) had higher pK<sub>a</sub>s in protonated-switch conformations than in unprotonated-switch  
294 conformations. In general, our pK<sub>a</sub> calculations and structural analyses both indicated increased Asp  
295 residue protonation in the protonated-switch conformation, and reflected the expected trend of  
296 increasing numbers of protonated Asp or Glu residues at lower pH.

297 Analysis of switch domain conformations and RBD positions (**Figure 7A**) indicated a  
298 concordance between switches interacting with NTD (breaking coordinated interprotomer  
299 interactions) and the locking of RBDs in the down position. Thus, at pH 5.5, the unprotonated-  
300 switches in protomers B and C interacted with the SD2 domain of the neighboring protomer to  
301 transmit lateral displacements of domains. At pH 4.0, the protonated-switches interrupt this  
302 interprotomer interaction, resulting in the locking of RBDs in the down position.

303

### 304 **Impact of Asp614Gly mutation**

305 Analysis of SARS-CoV-2 variant sequences identifies an Asp614Gly mutation to be  
306 associated with more transmissible viral variants (Daniloski et al., 2020; Hu et al., 2020; Ke et al.,  
307 2020; Korber et al., 2020; Ozono et al., 2020; Yurkovetskiy et al., 2020). Our structures revealed  
308 Asp614 to be located at the key interprotomer juncture between SD2 domain and switch, forming a  
309 hydrogen bond with Tyr837 of unprotonated-switches (**Figure 7B, left**) and recognizing the  
310 backbone carbonyl of Ile 834 in protonated-switches (**Figure 7B, right**). To test the impact of this  
311 mutation on unfolding enthalpy, we performed DSC measurements at pH 7.4, 5.5, and 4.0 (**Figure**  
312 **7C**). While the enthalpies at pH 5.5 and 4.0 were similar to those of wild-type spike, the unfolding  
313 enthalpy at pH 7.4 was dramatically increased, with the appearance of a high melting temperature  
314 peak for the variant (**Figure 7D**), seen for the wild-type only at low pH. The dramatic difference in  
315 melting enthalpy demonstrated the substantive energetic effect of altering an interprotomer-switch  
316 interface. To test the influence of this increased unfolding enthalpy on ACE2 interaction, we  
317 performed biolayer interferometry (BLI) on dimeric ACE2 recognizing spike or Asp614Gly variant.  
318 At pH 7.4 we observed higher binding of the wild-type spike than the Asp614Gly variant to dimeric

319 ACE2 (**Figure 7E, left**), consistent with DSC showing more unfolding enthalpy for the variant  
320 spike, thereby reducing its ability to bind dimeric ACE2 with avidity.

321 We next tried to understand the impact of the Asp614Gly mutation on the switch-based  
322 mechanism locking RBD in the down position at low pH. As switches with disorder in the region  
323 contacting SD2 were associated with “up” RBDs, we hypothesized that mutation of Asp614 to Gly  
324 would more closely mimic the loss of interaction between SD2 and switch, as exemplified by RBD<sub>B</sub>  
325 and switch C. Indeed, BLI measurements at pH 4.0 showed dimeric ACE2 to bind the Asp614Gly  
326 variant with greater apparent affinity (**Figure 7E, right**), consistent with the higher probability of  
327 RBDs adopting the “up” position, and providing an explanation for its increased infectivity  
328 (Daniloski et al., 2020; Hu et al., 2020; Korber et al., 2020; Ozono et al., 2020; Yurkovetskiy et al.,  
329 2020; Zhang et al., 2020). To test the impact on antibody binding, we used BLI to measure the  
330 affinity of CR3022 to spike and Asp614Gly variant. Similar to what we observed with dimeric ACE2,  
331 CR3022 bound wild-type spike more tightly than Gly variant at serological pH, with this behavior  
332 inverting at low pH where spike folding and switch locking reduced antibody interaction with wild-  
333 type but less so with variant spike (**Figure 7F**). Lastly, we tested the ability of antibody CR3022 to  
334 neutralize the Asp614Gly variant, using a pseudovirus format. The Asp614Gly variant showed a  
335 modest increase in neutralization sensitivity to CR3022 (**Figure 7G**), indicating its conformational  
336 masking to be mostly intact, with the observed increase in spike binding to CR3022 at low pH  
337 perhaps compensating for altered spike interactions with ACE2.

338

### 339 **Conformational masking of SARS-CoV-2 spike**

340 The conformational masking mechanism of immune evasion we delineate here for the  
341 SARS-CoV-2 spike involves both serological and endosomal components. At serological pH, the

342 low folding enthalpy of the spike enables antibodies like CR3022 to bind bivalently, with high  
343 apparent affinity. Such avidity-based binding would be expected to short-circuit adaptive immune  
344 processes of affinity maturation; indeed, analysis of SARS-CoV-2-elicited antibodies indicates  
345 RBD-recognizing antibodies to have only a low degree of somatic hypermutation, consistent with  
346 impaired maturation (Brouwer et al., 2020; Liu et al., 2020; Robbiani et al., 2020; Rogers et al.,  
347 2020; Seydoux et al., 2020).

348 We demonstrate for CR3022 IgG that its recognition of spike does not impede ACE2  
349 binding, allowing the virus to initiate entry. Once virus binds ACE2, and endosomal entry begins,  
350 the pH around the spike would decrease from 7.4 (serum) to ~6.0 (early endosome) and then to  
351 5.5-4.5 (late endosome-early lysosome) (**Figure 1**). We find this drop in pH has little impact on  
352 ACE2 binding (**Figure 2**), which we observe to maintain nM affinity to spike even at pH 4.5  
353 (**Figure S3B**). We explicitly show >1000-fold relative affinity difference between spike and RBD  
354 for CR3022 to occur – not at pH 6.0 (where substantial spike folding occurs) – but at pH 4.5. Thus,  
355 it is not the increased unfolding enthalpy of the spike that appears to result in reduced CR3022  
356 affinity, but the pH-switch mediated locking of RBDs in the all-down conformation. We show that  
357 between pH 5.5 and 4.5, the spike transitions from a single-RBD-up conformation to a locked all-  
358 down state (**Figure 3**). The all-down state appears to be stably maintained between pH 4.5 and 4.0,  
359 and we performed comparative analyses of pH 5.5 and 4.0 structures, revealing the transition to  
360 all-down-RBDs to be mediated by a pH-dependent switch, which undergoes dramatic structural  
361 refolding (**Figures 4-6**). We show the switch, located at the nexus of SD1 and SD2 on one  
362 protomer and NTD and S2 of another protomer, to be key for controlling the positioning of RBD  
363 and in shedding potentially neutralizing antibodies that recognize RBD in the up position.

364



## 365 **Discussion**

366           Viral spikes are prime targets for neutralizing antibody, and many have evolved  
367 mechanisms for immune evasion, some of which resemble aspects of the endosomal pH-dependent  
368 conformational masking described here. Receptor binding-site masking through endosomal  
369 cleavage, for example, occurs with the Ebola virus glycoprotein trimer (Kaletsy et al., 2007), and  
370 conformational masking has been previously described for the HIV-1 envelope trimer (Kwong et  
371 al., 2002), which is labile and elicits antibodies of little neutralization capacity. With SARS-CoV-2,  
372 we delineate conformational masking explicitly here for the non-neutralizing antibody CR3022,  
373 which we focused on primarily because of its extensive prior characterization (Huo et al., 2020;  
374 Yuan et al., 2020). We anticipate endosomal affinity reduction to apply to all RBD-up recognizing  
375 antibodies – including neutralizing antibodies – although this remains to be explicitly shown; we  
376 note however that CR3022 has ~100-fold higher affinity to SARS-CoV-1 (Yuan et al., 2020),  
377 against which it was originally elicited and which it does neutralize, suggesting its inability to  
378 neutralize SARS-CoV-2 stems from a combination of its lower affinity and the endosomal shedding  
379 that we describe here.

380           The functional purpose of the up-down positioning of RBD domains in coronaviruses has  
381 been a point of debate, since structures with RBD-up and RBD-down have been determined  
382 (Beniac et al., 2006; Gui et al., 2017; Kirchdoerfer et al., 2016; Pallesen et al., 2017; Shang et al.,  
383 2020a; Shang et al., 2018; Song et al., 2018; Walls et al., 2016; Yuan et al., 2017). Do the waving  
384 RBDs of other coronavirus spikes elicit antibody that is then shed through endosomal entry  
385 mechanisms along the lines that we outline for SARS-CoV-2? We note that the switch domains  
386 from bat RaTG13 and SARS-CoV-1 are virtually identical in sequence to that of SARS-CoV-2, and  
387 aspartic acids residues are mostly conserved in MERS (**Figures S7**), potentially indicating the

388 switch-based all-RBD-down locking strategy of immune evasion described here to enable other  
389 coronaviruses that utilize endosomal entry to avoid neutralization by RBD-up-recognizing  
390 antibody.

391 The critical switch region (residues 824-858) displays remarkable structural diversity within  
392 coronaviruses, segregating into three structural clusters (**Figure S7**). Each of the structures within  
393 these clusters generally comprises two helices, linked by a disulfide, in distinct orientations relative  
394 to each other and to the surrounding domains. The structural diversity of the switch region, defined  
395 here for SARS-CoV-2 along its endosomal entry pathway and recently at higher pH (Cai et al.,  
396 2020; Wrobel et al., 2020), provides a further example of how type 1 fusion machines can use  
397 structural rearrangement not only to merge membranes (e.g. transitioning from prefusion to  
398 intermediate to postfusion states) but to evade potential neutralizing antibodies that recognize the  
399 prefusion state.

400

401

## 402 **Acknowledgements**

403 We thank S. Goff for discussions on viral variants and entry mechanism, R. Grassucci, Y.-C. Chi  
404 and Z. Zhang from the Cryo-EM Center at Columbia University for assistance with cryo-EM data  
405 collection, M.G. Joyce for antibody CR3022, J.S. McLellan for spike expression vector, E.H. Zhou  
406 for assistance with movies, and members of the Virology Laboratory and Vector Core, Vaccine  
407 Research Center, for discussions and comments on the manuscript. Support for this work was  
408 provided by the Intramural Research Program of the Vaccine Research Center, National Institute  
409 of Allergy and Infectious Diseases (NIAID), Federal funds from the Frederick National Laboratory  
410 for Cancer Research under Contract HHSN261200800001E (A.S., T.S., Y.T.). Cryo-EM data for

411 the spike-ACE2 complexes were collected at Columbia University Cryo-EM Center at the  
412 Zuckerman Institute, and at the National Center for CryoEM Access and Training (NCCAT) and  
413 the Simons Electron Microscopy Center located at the New York Structural Biology Center,  
414 supported by the NIH Common Fund Transformative High Resolution Cryo-Electron Microscopy  
415 program (U24 GM129539,) and by grants from the Simons Foundation (SF349247) and NY State  
416 Assembly. Cryo-EM datasets for individual spike proteins were collected at the National CryoEM  
417 Facility (NCEF) of the National Cancer Institute. This research was, in part, supported by the  
418 National Cancer Institute's National Cryo-EM Facility at the Frederick National Laboratory for  
419 Cancer Research under contract HSSN261200800001E. We are especially grateful to U. Baxa, A.  
420 Wier, M. Hutchison, and T. Edwards of NCEF for collecting cryo-EM data and for technical  
421 assistance with cryo-EM data processing. Frederick Research Computing Environment (FRCE)  
422 high-performance computing cluster was used for processing cryo-EM datasets of individual spike  
423 proteins.

424

#### 425 **Author Contributions**

426 Y.T. and T.Z. determined ligand-free spike structures at pH 5.5, 4.5, and 4.0; A.S.O. produced  
427 spike and Asp614Gly variant and performed DSC; J.G. M.R. and G.C. determined spike-ACE2  
428 structures; G.-Y.C. carried out informatics analyses; P.S.K. performed SPR; A.N. carried out BLI;  
429 J.M.S. calculated pKa; A.S. performed ITC; P.W. performed neutralization assessments; J.B.,  
430 W.S., I.T.T., B.Z. provided reagents; J.C.B. analyzed switch mechanics; T.S. prepared ligand-free  
431 cryo-EM specimens; M.S. produced spike expression vectors; J.S. assisted with entry mechanism;  
432 S.W. assisted with manuscript preparation; R.A.F. supervised pKa calculations; D.D.H.  
433 supervised neutralization; J.R.M. supervised reagents and analyses, L.S. supervised SPR and

434 cryo-EM studies with ACE2; P.D.K. oversaw the project and –with T.Z., Y.T., A.S.O., J.G.,  
435 P.S.K. A.N., A.S., P.W., W.S., B.Z., G.-Y.C., J.M.S., S.W., and L.S. – wrote the manuscript, with  
436 all authors providing revisions and comments.

437

438 **Competing interest declaration**

439 The authors declare no competing interest.

440

441

442 **STAR<sup>®</sup>METHODS**

443 **RESOURCE AVAILABILITY**

444 **Lead Contact**

445 Further information and requests for resources and reagents should be directed to and will be  
446 fulfilled by the Lead Contact, Peter D. Kwong ([pdkwong@nih.gov](mailto:pdkwong@nih.gov)).

447

448 **Materials Availability**

449 This study did not generate new unique reagents.

450

451 **Data and Code Availability**

452 Cryo-EM structure coordinates and electron density maps for the SARS-CoV-2 spike ligand free  
453 and ACE2 complexes are in the process of being deposited with the Protein Data Bank and  
454 Electron Microscopy Data Bank.

455

456 **EXPERIMENTAL MODEL AND SUBJECT DETAILS**

457 **Cell Lines**

458 FreeStyle 293-F (cat# R79007) and Expi293F cells (cat# A14528; RRID: CVCL\_D615)  
459 were purchased from ThermoFisher Scientific Inc. FreeStyle 293-F cells were maintained in  
460 FreeStyle 293 Expression Medium, while Expi293F cells were maintained in Expi Expression  
461 Medium. The above cell lines were used directly from the commercial sources and cultured  
462 according to manufacturer suggestions. HEK293T (cat# CRL-11268) and Vera E6 cells (cat#  
463 CRL-1586) were purchased from ATCC and were maintained and used according to manufacturer  
464 instructions.

465

## 466 **METHOD DETAILS**

### 467 **Production of spike, ACE2 receptor and antibodies**

468 SARS-CoV-2 spike (Wrapp et al., 2020) and its D614G mutant were expressed by transient  
469 transfection in 293 Freestyle cells. Briefly, 1 mg of DNA was transfected into 1L of cells using  
470 Turbo293 transfection reagent, and the cells were allowed to grow at 37°C for 6 days. Following  
471 expression, the supernatant was cleared by centrifugation and filtration, and then incubated with  
472 cOmplete His-Tag Purification resin. The resin was washed with PBS containing increasing  
473 concentrations of imidazole, and the protein eluted in 20 mM Tris pH8.0, 200 mM NaCl, 300 mM  
474 Imidazole. HRV3C protease was added at a 1:20 mass ratio and incubated overnight at 4 °C to  
475 cleave the purification tags. The protein was then applied to a Superdex 200 column in PBS, after  
476 which the spike containing fractions were pooled and concentrated to 1 mg/ml. Single chain Fc  
477 tagged RBD and NTD domains were expressed in the same manner, and purified using capture by  
478 Protein A resin, followed by cleavage of the tag using HRV3C (Zhou et al., 2020b) and gel  
479 filtration.

480 Human ACE2 proteins were prepared in monomeric form (residues 1-620) and in dimeric  
481 form (residues 1-740). The expression plasmids were constructed and the protein purified as  
482 described previously (Zhou et al., 2020b). Briefly, DNA sequence encoding monomeric or dimeric  
483 ACE2 was synthesized and cloned into a plasmid with an HRV3C cleavage site, monomeric Fc tag  
484 and 8xHisTag at the 3'-end. The proteins were expressed by transient transfection of 293F cells  
485 and purified from a Protein A column. The tag was removed by overnight HRV3C digestion at 4  
486 °C. The proteins were further purified with a Superdex 200 16/60 column in 5 mM HEPES, pH7.5  
487 and 150 mM NaCl.

488 For antibody preparation, DNA sequences of antibody CR3022 (Yuan et al., 2020) heavy  
489 and light chains were cloned into the pVRC8400 vector, as described previously (Wu et al., 2011),  
490 expressed and purified as described (Zhou et al., 2020b). The Fab fragments were generated by  
491 overnight digestion with Endoproteinase LysC (New England Biolabs) at 37 °C and purified by  
492 protein A column to remove uncut IgG and Fc fragments.

493

#### 494 **Differential scanning calorimetry**

495 DSC analyses were performed using a Microcal VP-Capillary DSC. The proteins were  
496 diluted to 0.25 mg/ml in 1X PBS or various solutions containing a final concentration of 100 mM  
497 buffer and 200mM NaCl. The buffers used were: pH 4.0-pH 5.5, Sodium Acetate; pH 6.0-pH 6.5,  
498 MES; pH 7.0, HEPES; pH 7.4, 1X PBS; pH 8.0-pH 8.5, Tris; and pH 9.0, Sodium Borate. The  
499 proteins were scanned at 1 °C per minute from 25 – 90 °C using a filter period of 25 s. Data were  
500 analyzed using the Origin based Microcal DSC Automated Analysis software, where baselines  
501 were subtracted, and peak area and  $T_m$  calculated. The melting curves and unfolding enthalpy  
502 graphs were made in Excel.

503

#### 504 **Isothermal titration calorimetry**

505 Calorimetric titration experiments were performed at 25 °C using a VP-ITC  
506 microcalorimeter from MicroCal/Malvern Instruments (Northampton, MA, USA). The spike  
507 protein, ACE2 and Fab of CR3022 were prepared and exhaustively dialyzed against PBS, pH 7.4,  
508 prior to the experiments. Any dilution steps prior to the experiments were made using the dialysate  
509 to avoid any unnecessary heats of dilution associated with the injections. All reagents were  
510 thoroughly degassed prior to the experiments. For the direct determination of the binding to the

511 spike protein, the solution containing either ACE2 or CR3022(Fab) was added stepwise in 10  $\mu$ L  
512 aliquots to the stirred calorimetric cell ( $\sim$  1.4 ml) containing spike protein at 0.4 – 0.5  $\mu$ M  
513 (expressed per trimer). The concentration of titrant in the syringe was 12 – 14  $\mu$ M for both ACE2  
514 and CR3022(Fab). The effect of CR3022 on ACE2 binding to spike protein was studied by first  
515 titrating the spike protein with CR3022 until complete saturation was reached, and then performing  
516 a complete titration of the complex with ACE2. Despite the thorough dialysis, the heat of  
517 dilution/injection associated with the injection of ACE2 into the complex was considerable during  
518 the course of the titration and needed to be accounted for in the analysis. The heat evolved upon  
519 each injection was obtained from the integral of the calorimetric signal and the heat associated  
520 with binding was obtained after subtraction of the heat of dilution. The enthalpy change,  $\Delta H$ , the  
521 association constant,  $K_a$ , and the stoichiometry,  $N$ , were obtained by nonlinear regression of the  
522 data to a single-site binding model using Origin with a fitting function made inhouse. Gibbs  
523 energy,  $\Delta G$ , was calculated from the binding affinity using  $\Delta G = -RT\ln K_a$ , ( $R = 1.987$  cal/(K  $\times$   
524 mol)) and  $T$  is the absolute temperature in kelvin). The entropy contribution to Gibbs energy,  $-T\Delta S$ ,  
525 was calculated from the relation  $\Delta G = \Delta H - T\Delta S$ .

526

## 527 **SPR binding experiments**

528 SPR binding experiments were performed using a Biacore T200 biosensor, equipped with a  
529 Series S SA chip. The running buffer varied depending on the pH of the binding reaction;  
530 experiments at pH 7.4 were performed in a running buffer of 10 mM HEPES pH 7.4, 150 mM  
531 NaCl, 0.2 mg/ml BSA and 0.01% (v/v) Tween-20; at pH 5.5 experiments were performed in 10  
532 mM sodium acetate pH 5.5, 150 mM NaCl, 0.2 mg/ml BSA and 0.01% (v/v) Tween-20; and at pH



533 4.5 in 10 mM sodium acetate pH 4.5, 150 mM NaCl, 0.2 mg/mL BSA and 0.01% (v/v) Tween-20.

534 All measurements were performed at 25 °C.

535 Biotinylated spike and RBD were captured over independent flow cells at 700-1000 RU  
536 and 150 RU respectively for both the CR3022 IgG and the dimeric ACE2 binding experiments. To  
537 avoid the difficulty in surface regeneration that arises with slow dissociation, we used single-cycle  
538 kinetics binding experiments. CR3022 IgG was tested at analyte concentrations 36-1.33 nM  
539 prepared in running buffer at each pH, using a three-fold dilution series. In addition, CR3022 IgG  
540 was tested over the spike at higher analyte concentrations ranging 108-4 nM, 360-13.33 nM and  
541 1000-37.04 nM at pH 4.5, only to confirm the absence of binding to the spike at pH 4.5. Dimeric  
542 ACE2 was tested at 90-3.33 nM prepared in running buffer at each pH, using a three-fold dilution  
543 series. Binding over the spike or RBD surface as well as over a streptavidin reference surface was  
544 monitored for 120 s, followed by a dissociation phase of 120-900 s depending on the interaction at  
545 50 µl/min. Four blank buffer single cycles were performed by injecting running buffer instead of  
546 Fab to remove systematic noise from the binding signal. The data was processed and fit to 1:1  
547 single cycle model using Scrubber 2.0 (BioLogic Software).

548

#### 549 **Cryo-EM structures of ACE2-spike complexes**

550 SARS-CoV-2 spike was incubated with 3-fold molar excess of ACE2 receptor with a final  
551 trimer concentration of 1 mg/ml in either PBS, pH 7.4, or 10 mM sodium acetate, pH 5.5, with 150  
552 mM NaCl. The samples (2 µl) were vitrified using a Leica EM GP and Vitrobot Mark IV plunge  
553 freezers on glow-discharged carbon-coated copper grid (protochip, CF 1.2/1.3). Data were  
554 collected on a 300 kV Titan Krios equipped with a Gatan K3-BioQuantum direct detection device  
555 using Leginon software (Suloway et al., 2005). The total dose was fractionated for 2 s over 40 raw

556 frames. Motion correction, contrast transfer function (CTF) estimation, particle picking with topaz  
557 (Bepler et al., 2019) and extraction, 2D classification, ab initio model generation, 3D refinements  
558 and local resolution estimation were carried out in cryoSPARC 2.14 (Punjani et al., 2017). We  
559 note that some classes of unbound spike were also observed in both datasets however particle  
560 picking was optimized for complexes so the fraction was low. The 3D reconstructions were  
561 performed using C1 symmetry for all complexes as the ACE2-RBD region showed flexibility that  
562 prohibited typical symmetry operations in the triple-bound complexes. However, the RBD-ACE2  
563 region was assessed in greater detail through focused refinement following particle expansion with  
564 C3 symmetry applied to the pH 7.4 triple bound reconstruction. This RBD-ACE2 model was then  
565 used as a reference structure for refinement of all other ACE2-bound models.

566           The coordinates of SARS CoV-2 spike ectodomain structures, PDB entries 6VXX  
567 and 6M0J (Walls et al., 2020), were employed as initial models for fitting the cryo-EM map of  
568 the ACE2 bound structures. Manual and automated model building were iteratively performed  
569 using Coot (Emsley and Cowtan, 2004) and real space refinement in Phenix to accurately fit the  
570 coordinates to the electron density map. Molprobity (Davis et al., 2004) was used to validate  
571 geometry and check structure quality. UCSF ChimeraX (Goddard et al., 2018) was used for map-  
572 fitting cross correlation calculation (Fit-in-Map tool) and for figure preparation.

573

#### 574 **Negative-stain electron microscopy**

575           The following buffers were used to study SARS-CoV-2 S conformation at different pH: 0.1  
576 M sodium acetate (pH 3.6–5.5), PBS (pH 7.4), 0.1 M Trizma-HCl (pH 8.8). A sample of SARS-  
577 CoV-2 S with a concentration of 1 mg/ml was diluted with the target buffer 10 times, and the  
578 diluted sample was incubated on ice for 15 min. Immediately before negative staining, the sample

579 was further diluted 5 times with the following buffer: 10 mM sodium acetate, 150 mM NaCl (for  
580 pH 3.6–5.5); 10 mM HEPES, 150 mM NaCl (for pH 7.4); 10 mM Trizma-HCl, 150 mM NaCl (for  
581 pH 8.8). A 4.7- $\mu$ l drop of the diluted sample was applied to a glow-discharged carbon-coated  
582 copper grid for 10-15 s. The drop was removed with filter paper, and the grid was washed by  
583 applying consecutively three 4.7- $\mu$ l drops of the buffer used for diluting the sample and removing  
584 them with filter paper. Protein molecules adsorbed to the carbon were negatively stained by  
585 applying consecutively three 4.7- $\mu$ l drops of 0.75% uranyl formate in the same manner. The grid  
586 was air-dried and screened for staining quality and particle density using a Hitachi H-7650  
587 transmission electron microscope (TEM). Datasets were collected using an FEI T20 TEM  
588 equipped with an Eagle CCD camera. The microscope was operated at 200 kV, the pixel size was  
589 2.2 Å (nominal magnification: 100,000), and the defocus was -1.2  $\mu$ m. SerialEM (Mastronarde,  
590 2005) was used for data collection. Particles were picked automatically and extracted into  
591 160x160- or 192x192-pixel boxes using in-house written software (YT, unpublished). 2D  
592 classification was performed using Relion 1.4 and Relion 3.0 (Scheres, 2012).

593

#### 594 **Cryo-EM specimen preparation and data collection of individual spikes**

595 A sample of SARS-CoV-2 S in PBS with a protein concentration of 1 mg/ml was diluted to  
596 0.5 mg/ml using 0.2 M sodium acetate, pH 4.0 or pH 5.5 (final sodium acetate concentration: 0.1  
597 M). Separate measurements with a pH meter confirmed that combining equal volumes of PBS and  
598 0.2 M sodium acetate, pH 4.0 or pH 5.5, produces solutions with pH 4.0 and pH 5.5, respectively.  
599 Quantifoil R 2/2 gold grids were used for specimen preparation. The grids were glow-discharged  
600 using a PELCO easiGlow device (air pressure: 0.39 mBar, current: 20 mA, duration: 30 s)  
601 immediately before vitrification. Cryo-EM grids were prepared by plunge-freezing in liquid ethane

602 using an FEI Vitrobot Mark IV plunger with the following settings: chamber temperature of 4°C,  
603 chamber humidity of 95%, blotting force of -5, blotting time of 5 s, and drop volume of 2.7 µl.  
604 Datasets were collected at the National CryoEM Facility (NCEF), National Cancer Institute, on a  
605 Thermo Scientific Titan Krios G3 electron microscope equipped with a Gatan Quantum GIF  
606 energy filter (slit width: 20 eV) and a Gatan K3 direct electron detector. Four movies per hole were  
607 recorded in the counting mode using Latitude software. The dose rate was 13.4 e<sup>-</sup>/s/pixel.

608

### 609 **Cryo-EM data processing and structural refinement for individual spikes**

610 Each dataset was divided into subsets which were initially processed independently in  
611 parallel using Frederick Research Computing Environment (FRCE) computing cluster and later  
612 combined for the final refinement. Movie frame alignment was performed using MotionCorr2  
613 (Zheng et al., 2017). Ctffind4 was used to determine the parameters of CTF (Rohou and Grigorieff,  
614 2015). The remaining processing steps were performed using Relion 3.0 (Scheres, 2012) unless  
615 otherwise stated. For spike at pH 4.0, a small particle set was selected manually and used to obtain  
616 2D classes which were utilized as templates to select a larger set of particles. An initial 3D model  
617 was obtained using EMAN 2.1 (Tang et al., 2007) from the 2D classes generated from this  
618 extended particle set. This 3D model was then subjected to 3D auto-refinement, and the resulting  
619 map was used to generate low-pass filtered picking templates for the entire dataset. For spike at pH  
620 5.5, particle picking was performed with cryOLO 1.5 (Wagner et al., 2019) using a general  
621 network model, and an initial 3D model was obtained with EMAN 2.1 from a subset of resulting  
622 2D classes. The following steps included rounds of 3D classification, 3D auto-refinement, CTF  
623 refinement, and particle polishing. Map resolutions were calculated using the gold-standard  
624 approach (Henderson et al., 2012) at the FSC curve threshold of 0.143. ResMap 1.1.4 was used to

625 asses local resolution (Kucukelbir et al., 2014). Local map sharpening was performed using  
626 phenix.auto\_sharpen (Terwilliger et al., 2018). SPIDER 22.1 was used for map conversion and re-  
627 sizing (Frank et al., 1996). Correlations between cryo-EM maps and atomic models were assessed  
628 using phenix.mtriage (Afonine et al., 2018). UCSF Chimera was used for docking and  
629 visualization (Pettersen et al., 2004). Despite the fact that C3 symmetry was imposed during the  
630 reconstruction of spike for the pH 4.0 dataset, the resulting map displayed some asymmetrical  
631 features in some regions, such as that around residue 830. Therefore, the three chains of the atomic  
632 model were built and refined individually. The coordinates of SARS CoV-2 spike ectodomain  
633 structures, PDB entries 6VXX and 6VYB, were used as initial models for fitting the cryo-EM map  
634 of the spike structures at pH 4.0 and pH 5.5 structures. Iterative model building and real space  
635 refinement were carried out using Coot (Emsley and Cowtan, 2004) and Phenix to accurately fit  
636 the coordinates to the electron density map. Molprobity (Davis et al., 2004) was used to validate  
637 geometry and check structure quality.

638

### 639 **3D variability analysis of cryo-EM structures of individual spikes and analysis of** 640 **conformations of the RBD**

641 For 3D variability analysis, a subset of 100,000 particles randomly selected from the final  
642 particle set at pH 5.5 was exported into cryoSPARC 2.15 (Punjani et al., 2017), and a  
643 homogeneous refinement was performed without imposing symmetry. The 3D variability analysis  
644 was set up to use three eigenvectors of the 3D covariance, and 20 frames were used for  
645 visualization of results. The eigenvectors describing movements of the RBD were identified via  
646 examining the resulting volume series and corresponding variability movies (Videos S1-4).

647           The structural heterogeneity of the consensus pH 5.5 map in the RBD region was analyzed  
648 using local 3D classification. To obtain an accurate mask encompassing the conformational space  
649 of the dynamic RBD, the four 3D variability volumes corresponding to the beginning and the end  
650 of the trajectories defined by eigenvectors 0 and 2 were first aligned to the consensus cryo-EM  
651 map. For each of the four volumes, the density corresponding to the dynamic RBD was isolated by  
652 performing volume segmentation in UCSF Chimera (Pettersen et al., 2004). These RBD sub-  
653 volumes were added together, and a soft mask was created from the resulting composite volume by  
654 low-pass filtering the density to 15 Å, extending the resulting volume by 2 pixels, and adding a  
655 soft edge of 5 pixels using `reliion_mask_create`. Local 3D classification of the consensus dataset  
656 within this mask was performed without particle alignment in Relion 3 (Scheres, 2012), followed  
657 by global 3D refinement of each of the resulting six maps.

658

### 659 **Identification of SARS-CoV-2 spike refolding regions between pH 5.5 and pH 4.0 structures**

660           We used a sliding window of 11 amino acids and 21 amino acids respectively to align and  
661 calculate backbone (C, Ca, O, N) rmsd values between the pH 4 structure (protomer B) and pH 5.5  
662 single-RBD-up or pH 5.5 all-RBD-down structures, respectively, using PyMol (Version 2.3.4).  
663 Calculation was omitted if the specified residue range had less than 22 backbone atoms. The  
664 average rmsd values of pH 5.5 single-RBD-up conformation 1 and conformation 2 were reported  
665 for pH 5.5 single-RBD-up analysis. The refolding regions were defined as residues with greater  
666 than 2-Å rmsd. Refolding regions with more than one consecutive residue were further considered,  
667 and single residue gaps were ignored when determining the residue ranges. Manual inspection  
668 revealed 11 amino acid-window to correspond better with domain movements. Therefore, the  
669 results from only 11 amino acid-window analysis were reported.

670

## 671 **Clustering of coronavirus spike structures based on the switch region**

672         The coronavirus spike structures were obtained from PDB using sequence similarity search  
673 against SARS-CoV-2 spike protein with the default parameters. After manual examinations,  
674 structures that were not coronavirus spike trimers were excluded. For the rest of the structures, the  
675 sequences were aligned using ClustalW (Larkin et al., 2007) and chains with at least 70% of the  
676 residues determined of the switch region (residues 824-858, SARS-CoV-2 numbering) were  
677 further considered. The structures were clustered using the hclust function implemented in  
678 statistical package R based on the pairwise backbone rmsd distances calculated with the rms\_cur  
679 function in PyMOL after the switch regions were aligned.

680

## 681 **Bio-layer interferometry (BLI)**

682         A FortéBio Octet HTX instrument (FortéBio) was used to assess binding over a wide pH  
683 range. Experiments were setup in tilted black 384-well plates (FortéBio) in 10mM of the  
684 corresponding buffer, plus 150mM NaCl, 0.02% Tween20, 0.1% BSA and 0.05% sodium azide.  
685 Buffers used for pH 8.0 to 4.0 are as described above in the DSC section. Plates were agitated at  
686 1,000 rpm, and the temperature was set to 30°C. Anti-human IgG Fc capture biosensors (FortéBio)  
687 were used to immobilize 300nM CR3022 IgG or dimeric ACE2-Fc for 150 seconds at pH 7.4.  
688 Following loading of CR3022 IgG, sensors were placed in the pH 7.4 buffer for 30 seconds and  
689 then equilibrated in the respective pH buffer for 180 seconds. Binding was measured for 180  
690 seconds in 200 nM spike or D614G mutant. Binding quantification (Figure 7d, e) was performed  
691 using the response value (nm) in the last second of the association step. Dissociation in the  
692 respective buffer was recorded for 300 seconds.

693

## 694 **pKa calculations**

695 Individual residue pKas were calculated for the pH 4.0 all-down, pH 5.5 all-down, and pH  
696 5.5 single-up (conformations 1 and 2) structures using PROPKA (Olsson et al., 2011; Sondergaard  
697 et al., 2011). For residues in the chain B 830-855 switch domains and titratable residues within 5 Å  
698 of the switch domain, pKa data were analyzed and plotted using R (<https://www.R-project.org/>) in  
699 RStudio (<http://www.rstudio.com/>) with the ggplot2 library (Wickham, 2016) and structural  
700 figures were made using PyMOL.

701

## 702 **Pseudovirus construction and neutralization assessment**

703 Recombinant Indiana vesiculovirus (rVSV) expressing SARS-CoV-2 spike was generated  
704 as previously described (Nie et al., 2020; Whitt, 2010). HEK293T cells were grown to 80%  
705 confluency before transfection with pCMV3-SARS-CoV-2-spike (kindly provided by Peihui  
706 Wang, Shandong University, China) or the D614G variant (constructed by site-directed  
707 mutagenesis) using FuGENE 6 (Promega). The next day, medium was removed and VSV-G  
708 pseudotyped  $\Delta$ G-luciferase (G\* $\Delta$ G-luciferase, Kerafast) was used to infect the cells in DMEM at  
709 an MOI of 3 for 1 h before washing the cells with 1X DPBS three times. DMEM supplemented  
710 with 2% fetal bovine serum and 100 I.U./mL of penicillin and 100  $\mu$ g/mL of streptomycin was  
711 added to the inoculated cells. The supernatant was harvested the following day and clarified by  
712 centrifugation at 3000 rpm for 10 min before aliquoting and storing at  $-80^{\circ}\text{C}$ .

713 Neutralization assays were performed by incubating pseudoviruses with serial dilutions of  
714 antibodies and scored by the reduction in luciferase gene expression (Liu et al., 2020). In brief,  
715 Vero E6 cells (ATCC) were seeded in a 96-well plate at a concentration of  $2 \times 10^4$  cells per well.



716 Pseudoviruses were incubated the next day with serial dilutions of the antibodies in triplicate for  
717 30 min at 37°C. The mixture was added to cultured cells and incubated for an additional 24 h. The  
718 luminescence was measured by Britelite plus Reporter Gene Assay System (PerkinElmer). IC<sub>50</sub>  
719 was defined as the dilution at which the relative light units (RLUs) were reduced by 50%  
720 compared with the virus control wells (virus + cells) after subtraction of the background RLUs in  
721 the control groups with cells only. The IC<sub>50</sub> values were calculated using non-linear regression in  
722 GraphPad Prism 8.

723

## 724 **QUANTIFICATION AND STATISTICAL ANALYSIS**

725 The BLI and DSC data were analyzed and plotted using Excel and GraphPad Prism. The  
726 SPR data were processed and fit using Scrubber 2.0 (BioLogic Software). Cryo-EM data were  
727 processed and analyzed using CryoSparr and Relion. Cryo-EM structural statistics were analyzed  
728 with Phenix and Molprobit. Statistical details of experiments are described in Method Details or  
729 figure legends.

730

731

## 732 References

- 733 Afonine, P.V., Klaholz, B.P., Moriarty, N.W., Poon, B.K., Sobolev, O.V., Terwilliger, T.C.,  
734 Adams, P.D., and Urzhumtsev, A. (2018). New tools for the analysis and validation of cryo-  
735 EM maps and atomic models. *Acta Crystallogr D Struct Biol* *74*, 814-840.
- 736 Barnes, C.O., West, A.P., Jr., Huey-Tubman, K.E., Hoffmann, M.A.G., Sharaf, N.G., Hoffman,  
737 P.R., Koranda, N., Gristick, H.B., Gaebler, C., Muecksch, F., *et al.* (2020). Structures of  
738 Human Antibodies Bound to SARS-CoV-2 Spike Reveal Common Epitopes and Recurrent  
739 Features of Antibodies. *Cell*, 10.1016/j.cell.2020.06.025.
- 740 Beniac, D.R., Andonov, A., Grudeski, E., and Booth, T.F. (2006). Architecture of the SARS  
741 coronavirus prefusion spike. *Nat Struct Mol Biol* *13*, 751-752.
- 742 Benjaminsen, R.V., Sun, H., Henriksen, J.R., Christensen, N.M., Almdal, K., and Andresen, T.L.  
743 (2011). Evaluating nanoparticle sensor design for intracellular pH measurements. *ACS Nano* *5*,  
744 5864-5873.
- 745 Bepler, T., Morin, A., Rapp, M., Brasch, J., Shapiro, L., Noble, A.J., and Berger, B. (2019).  
746 Positive-unlabeled convolutional neural networks for particle picking in cryo-electron  
747 micrographs. *Nat Methods* *16*, 1153-1160.
- 748 Brouwer, P.J.M., Caniels, T.G., van der Straten, K., Snitselaar, J.L., Aldon, Y., Bangaru, S.,  
749 Torres, J.L., Okba, N.M.A., Claireaux, M., Kerster, G., *et al.* (2020). Potent neutralizing  
750 antibodies from COVID-19 patients define multiple targets of vulnerability. *Science*,  
751 10.1126/science.abc5902.
- 752 Cai, Y., Zhang, J., Xiao, T., Peng, H., Sterling, S.M., Walsh, R.M., Rawson, S., Rits-Volloch, S.,  
753 and Chen, B. (2020). Distinct conformational states of SARS-CoV-2 spike protein. *Science*,  
754 eabd4251.
- 755 Cao, Y., Su, B., Guo, X., Sun, W., Deng, Y., Bao, L., Zhu, Q., Zhang, X., Zheng, Y., Geng, C., *et*  
756 *al.* (2020). Potent neutralizing antibodies against SARS-CoV-2 identified by high-throughput  
757 single-cell sequencing of convalescent patients' B cells. *Cell*, 10.1016/j.cell.2020.05.025.
- 758 Daniloski, Z., Guo, X., and Sanjana, N.E. (2020). The D614G mutation in SARS-CoV-2 Spike  
759 increases transduction of multiple human cell types. *bioRxiv*, 2020.2006.2014.151357.
- 760 Davis, I.W., Murray, L.W., Richardson, J.S., and Richardson, D.C. (2004). MOLPROBITY:  
761 structure validation and all-atom contact analysis for nucleic acids and their complexes.  
762 *Nucleic Acids Res* *32*, W615-619.
- 763 Edwards, R.J., Mansouri, K., Stalls, V., Manne, K., Watts, B., Parks, R., Gobeil, S.M.C.,  
764 Janowska, K., Li, D., Lu, X., *et al.* (2020). Cold sensitivity of the SARS-CoV-2 spike  
765 ectodomain. *bioRxiv*, 2020.2007.2012.199588.
- 766 Emsley, P., and Cowtan, K. (2004). Coot: model-building tools for molecular graphics. *Acta*  
767 *Crystallogr D Biol Crystallogr* *60*, 2126-2132.
- 768 Frank, J., Radermacher, M., Penczek, P., Zhu, J., Li, Y., Ladjadj, M., and Leith, A. (1996).  
769 SPIDER and WEB: processing and visualization of images in 3D electron microscopy and  
770 related fields. *J Struct Biol* *116*, 190-199.

- 771 Goddard, T.D., Huang, C.C., Meng, E.C., Pettersen, E.F., Couch, G.S., Morris, J.H., and Ferrin,  
772 T.E. (2018). UCSF ChimeraX: Meeting modern challenges in visualization and analysis.  
773 *Protein Sci* 27, 14-25.
- 774 Gui, M., Song, W., Zhou, H., Xu, J., Chen, S., Xiang, Y., and Wang, X. (2017). Cryo-electron  
775 microscopy structures of the SARS-CoV spike glycoprotein reveal a prerequisite  
776 conformational state for receptor binding. *Cell Res* 27, 119-129.
- 777 Hansen, J., Baum, A., Pascal, K.E., Russo, V., Giordano, S., Wloga, E., Fulton, B.O., Yan, Y.,  
778 Koon, K., Patel, K., *et al.* (2020). Studies in humanized mice and convalescent humans yield a  
779 SARS-CoV-2 antibody cocktail. *Science*, 10.1126/science.abd0827.
- 780 Henderson, R., Sali, A., Baker, M.L., Carragher, B., Devkota, B., Downing, K.H., Egelman, E.H.,  
781 Feng, Z., Frank, J., Grigorieff, N., *et al.* (2012). Outcome of the first electron microscopy  
782 validation task force meeting. *Structure* 20, 205-214.
- 783 Hoffmann, M., Kleine-Weber, H., Schroeder, S., Kruger, N., Herrler, T., Erichsen, S., Schiergens,  
784 T.S., Herrler, G., Wu, N.H., Nitsche, A., *et al.* (2020). SARS-CoV-2 Cell Entry Depends on  
785 ACE2 and TMPRSS2 and Is Blocked by a Clinically Proven Protease Inhibitor. *Cell* 181, 271-  
786 280 e278.
- 787 Hu, J., He, C.-L., Gao, Q.-Z., Zhang, G.-J., Cao, X.-X., Long, Q.-X., Deng, H.-J., Huang, L.-Y.,  
788 Chen, J., Wang, K., *et al.* (2020). The D614G mutation of SARS-CoV-2 spike protein  
789 enhances viral infectivity and decreases neutralization sensitivity to individual convalescent  
790 sera. *bioRxiv*, 2020.2006.2020.161323.
- 791 Huo, J., Zhao, Y., Ren, J., Zhou, D., Duyvesteyn, H.M.E., Ginn, H.M., Carrique, L., Malinauskas,  
792 T., Ruza, R.R., Shah, P.N.M., *et al.* (2020). Neutralization of SARS-CoV-2 by Destruction of  
793 the Prefusion Spike. *Cell Host Microbe*, 10.1016/j.chom.2020.06.010.
- 794 Ju, B., Zhang, Q., Ge, J., Wang, R., Sun, J., Ge, X., Yu, J., Shan, S., Zhou, B., Song, S., *et al.*  
795 (2020). Human neutralizing antibodies elicited by SARS-CoV-2 infection. *Nature*,  
796 10.1038/s41586-020-2380-z.
- 797 Kaletsky, R.L., Simmons, G., and Bates, P. (2007). Proteolysis of the Ebola virus glycoproteins  
798 enhances virus binding and infectivity. *J Virol* 81, 13378-13384.
- 799 Ke, Z., Oton, J., Qu, K., Cortese, M., Zila, V., McKeane, L., Nakane, T., Zivanov, J., Neufeldt,  
800 C.J., Lu, J.M., *et al.* (2020). Structures, conformations and distributions of SARS-CoV-2 spike  
801 protein trimers on intact virions. *bioRxiv*, 2020.2006.2027.174979.
- 802 Kirchdoerfer, R.N., Cottrell, C.A., Wang, N., Pallesen, J., Yassine, H.M., Turner, H.L., Corbett,  
803 K.S., Graham, B.S., McLellan, J.S., and Ward, A.B. (2016). Pre-fusion structure of a human  
804 coronavirus spike protein. *Nature* 531, 118-121.
- 805 Korber, B., Fischer, W., Gnanakaran, S., Yoon, H., Theiler, J., Abfalterer, W., Hengartner, N.,  
806 Giorgi, E., Bhattacharya, T., Foley, B., *et al.* (2020). Tracking Changes in SARS-CoV-2 Spike:  
807 Evidence that D614G Increases Infectivity of the COVID-19 Virus. *Cell*,  
808 <https://doi.org/10.1016/j.cell.2020.1006.1043>.
- 809 Kucukelbir, A., Sigworth, F.J., and Tagare, H.D. (2014). Quantifying the local resolution of cryo-  
810 EM density maps. *Nat Methods* 11, 63-65.

- 811 Kwong, P.D., Doyle, M.L., Casper, D.J., Cicala, C., Leavitt, S.A., Majeed, S., Steenbeke, T.D.,  
812 Venturi, M., Chaiken, I., Fung, M., *et al.* (2002). HIV-1 evades antibody-mediated  
813 neutralization through conformational masking of receptor-binding sites. *Nature* *420*, 678-682.
- 814 Lan, J., Ge, J., Yu, J., Shan, S., Zhou, H., Fan, S., Zhang, Q., Shi, X., Wang, Q., Zhang, L., *et al.*  
815 (2020). Structure of the SARS-CoV-2 spike receptor-binding domain bound to the ACE2  
816 receptor. *Nature* *581*, 215-220.
- 817 Larkin, M.A., Blackshields, G., Brown, N.P., Chenna, R., McGettigan, P.A., McWilliam, H.,  
818 Valentin, F., Wallace, I.M., Wilm, A., Lopez, R., *et al.* (2007). Clustal W and Clustal X  
819 version 2.0. *Bioinformatics* *23*, 2947-2948.
- 820 Liu, L., Wang, P., Nair, M.S., Yu, J., Rapp, M., Wang, Q., Luo, Y., Chan, J.F.W., Sahi, V.,  
821 Figueroa, A., *et al.* (2020). Potent neutralizing antibodies directed to multiple epitopes on  
822 SARS-CoV-2 spike. *Nature*, 10.1038/s41586-020-2571-7.
- 823 Mastronarde, D.N. (2005). Automated electron microscope tomography using robust prediction of  
824 specimen movements. *J Struct Biol* *152*, 36-51.
- 825 Nie, J., Li, Q., Wu, J., Zhao, C., Hao, H., Liu, H., Zhang, L., Nie, L., Qin, H., Wang, M., *et al.*  
826 (2020). Establishment and validation of a pseudovirus neutralization assay for SARS-CoV-2.  
827 *Emerg Microbes Infect* *9*, 680-686.
- 828 Olsson, M.H., Sondergaard, C.R., Rostkowski, M., and Jensen, J.H. (2011). PROPKA3: Consistent  
829 Treatment of Internal and Surface Residues in Empirical pKa Predictions. *J Chem Theory*  
830 *Comput* *7*, 525-537.
- 831 Ozono, S., Zhang, Y., Ode, H., Seng, T.T., Imai, K., Miyoshi, K., Kishigami, S., Ueno, T., Iwatani,  
832 Y., Suzuki, T., *et al.* (2020). Naturally mutated spike proteins of SARS-CoV-2 variants show  
833 differential levels of cell entry. *bioRxiv*, 2020.2006.2015.151779.
- 834 Ou, X., Liu, Y., Lei, X., Li, P., Mi, D., Ren, L., Guo, L., Guo, R., Chen, T., Hu, J., *et al.* (2020).  
835 Characterization of spike glycoprotein of SARS-CoV-2 on virus entry and its immune cross-  
836 reactivity with SARS-CoV. *Nat. Communications* *11*, 1620.
- 837 Pallesen, J., Wang, N., Corbett, K.S., Wrapp, D., Kirchdoerfer, R.N., Turner, H.L., Cottrell, C.A.,  
838 Becker, M.M., Wang, L., Shi, W., *et al.* (2017). Immunogenicity and structures of a rationally  
839 designed prefusion MERS-CoV spike antigen. *Proceedings of the National Academy of*  
840 *Sciences* *114*, E7348-E7357.
- 841 Pettersen, E.F., Goddard, T.D., Huang, C.C., Couch, G.S., Greenblatt, D.M., Meng, E.C., and  
842 Ferrin, T.E. (2004). UCSF Chimera--a visualization system for exploratory research and  
843 analysis. *J Comput Chem* *25*, 1605-1612.
- 844 Punjani, A., Rubinstein, J.L., Fleet, D.J., and Brubaker, M.A. (2017). cryoSPARC: algorithms for  
845 rapid unsupervised cryo-EM structure determination. *Nat Methods* *14*, 290-296.
- 846 Robbiani, D.F., Gaebler, C., Muecksch, F., Lorenzi, J.C.C., Wang, Z., Cho, A., Agudelo, M.,  
847 Barnes, C.O., Gazumyan, A., Finkin, S., *et al.* (2020). Convergent antibody responses to  
848 SARS-CoV-2 in convalescent individuals. *Nature*, 10.1038/s41586-020-2456-9.
- 849 Robertson, A.D., and Murphy, K.P. (1997). Protein Structure and the Energetics of Protein  
850 Stability. *Chem Rev* *97*, 1251-1268.

- 851 Rogers, T.F., Zhao, F., Huang, D., Beutler, N., Burns, A., He, W.-t., Limbo, O., Smith, C., Song,  
852 G., Woehl, J., *et al.* (2020). Isolation of potent SARS-CoV-2 neutralizing antibodies and  
853 protection from disease in a small animal model. *Science*, eabc7520.
- 854 Rohou, A., and Grigorieff, N. (2015). CTFFIND4: Fast and accurate defocus estimation from  
855 electron micrographs. *J Struct Biol* 192, 216-221.
- 856 Scheres, S.H. (2012). RELION: implementation of a Bayesian approach to cryo-EM structure  
857 determination. *J Struct Biol* 180, 519-530.
- 858 Seydoux, E., Homad, L.J., MacCamy, A.J., Parks, K.R., Hurlburt, N.K., Jennewein, M.F., Akins,  
859 N.R., Stuart, A.B., Wan, Y.-H., Feng, J., *et al.* (2020). Characterization of neutralizing  
860 antibodies from a SARS-CoV-2 infected individual. *bioRxiv*, 2020.2005.2012.091298.
- 861 Shang, J., Wan, Y., Liu, C., Yount, B., Gully, K., Yang, Y., Auerbach, A., Peng, G., Baric, R., and  
862 Li, F. (2020a). Structure of mouse coronavirus spike protein complexed with receptor reveals  
863 mechanism for viral entry. *PLoS Pathog* 16, e1008392.
- 864 Shang, J., Ye, G., Shi, K., Wan, Y., Luo, C., Aihara, H., Geng, Q., Auerbach, A., and Li, F.  
865 (2020b). Structural basis of receptor recognition by SARS-CoV-2. *Nature* 581, 221-224.
- 866 Shang, J., Zheng, Y., Yang, Y., Liu, C., Geng, Q., Luo, C., Zhang, W., and Li, F. (2018). Cryo-EM  
867 structure of infectious bronchitis coronavirus spike protein reveals structural and functional  
868 evolution of coronavirus spike proteins. *PLoS Pathog* 14, e1007009.
- 869 Shi, R., Shan, C., Duan, X., Chen, Z., Liu, P., Song, J., Song, T., Bi, X., Han, C., Wu, L., *et al.*  
870 (2020). A human neutralizing antibody targets the receptor-binding site of SARS-CoV-2.  
871 *Nature*, 10.1038/s41586-020-2381-y.
- 872 Sondergaard, C.R., Olsson, M.H., Rostkowski, M., and Jensen, J.H. (2011). Improved Treatment  
873 of Ligands and Coupling Effects in Empirical Calculation and Rationalization of pKa Values. *J*  
874 *Chem Theory Comput* 7, 2284-2295.
- 875 Song, W., Gui, M., Wang, X., and Xiang, Y. (2018). Cryo-EM structure of the SARS coronavirus  
876 spike glycoprotein in complex with its host cell receptor ACE2. *PLoS Pathog* 14, e1007236.
- 877 Suloway, C., Pulokas, J., Fellmann, D., Cheng, A., Guerra, F., Quispe, J., Stagg, S., Potter, C.S.,  
878 and Carragher, B. (2005). Automated molecular microscopy: the new Legimon system. *J Struct*  
879 *Biol* 151, 41-60.
- 880 Tang, G., Peng, L., Baldwin, P.R., Mann, D.S., Jiang, W., Rees, I., and Ludtke, S.J. (2007).  
881 EMAN2: an extensible image processing suite for electron microscopy. *J Struct Biol* 157, 38-  
882 46.
- 883 ter Meulen, J., van den Brink, E.N., Poon, L.L., Marissen, W.E., Leung, C.S., Cox, F., Cheung,  
884 C.Y., Bakker, A.Q., Bogaards, J.A., van Deventer, E., *et al.* (2006). Human monoclonal  
885 antibody combination against SARS coronavirus: synergy and coverage of escape mutants.  
886 *PLoS Med* 3, e237.
- 887 Terwilliger, T.C., Sobolev, O.V., Afonine, P.V., and Adams, P.D. (2018). Automated map  
888 sharpening by maximization of detail and connectivity. *Acta Crystallogr D Struct Biol* 74, 545-  
889 559.

- 890 Turk, B., and Turk, V. (2009). Lysosomes as "suicide bags" in cell death: myth or reality? *J Biol*  
891 *Chem* 284, 21783-21787.
- 892 Wagner, T., Merino, F., Stabrin, M., Moriya, T., Antoni, C., Apelbaum, A., Hagel, P., Sitsel, O.,  
893 Raisch, T., Prumbaum, D., *et al.* (2019). SPHIRE-crYOLO is a fast and accurate fully  
894 automated particle picker for cryo-EM. *Commun Biol* 2, 218.
- 895 Walls, A.C., Park, Y.J., Tortorici, M.A., Wall, A., McGuire, A.T., and Velesler, D. (2020).  
896 Structure, Function, and Antigenicity of the SARS-CoV-2 Spike Glycoprotein. *Cell* 181, 281-  
897 292 e286.
- 898 Walls, A.C., Tortorici, M.A., Frenz, B., Snijder, J., Li, W., Rey, F.A., DiMaio, F., Bosch, B.J., and  
899 Velesler, D. (2016). Glycan shield and epitope masking of a coronavirus spike protein observed  
900 by cryo-electron microscopy. *Nat Struct Mol Biol* 23, 899-905.
- 901 Walls, A.C., Xiong, X., Park, Y.J., Tortorici, M.A., Snijder, J., Quispe, J., Camerini, E., Gopal, R.,  
902 Dai, M., Lanzavecchia, A., *et al.* (2019). Unexpected Receptor Functional Mimicry Elucidates  
903 Activation of Coronavirus Fusion. *Cell* 176, 1026-1039 e1015.
- 904 Wang, Q., Zhang, Y., Wu, L., Niu, S., Song, C., Zhang, Z., Lu, G., Qiao, C., Hu, Y., Yuen, K.Y.,  
905 *et al.* (2020). Structural and Functional Basis of SARS-CoV-2 Entry by Using Human ACE2.  
906 *Cell* 181, 894-904 e899.
- 907 Whitt, M.A. (2010). Generation of VSV pseudotypes using recombinant DeltaG-VSV for studies  
908 on virus entry, identification of entry inhibitors, and immune responses to vaccines. *J Virol*  
909 *Methods* 169, 365-374.
- 910 Wickham, H. (2016). *ggplot2: Elegant Graphics for Data Analysis*. (Springer-Verlag, New York).
- 911 Wrapp, D., Wang, N., Corbett, K.S., Goldsmith, J.A., Hsieh, C.L., Abiona, O., Graham, B.S., and  
912 McLellan, J.S. (2020). Cryo-EM structure of the 2019-nCoV spike in the prefusion  
913 conformation. *Science* 367, 1260-1263.
- 914 Wrobel, A.G., Benton, D.J., Xu, P., Roustan, C., Martin, S.R., Rosenthal, P.B., Skehel, J.J., and  
915 Gamblin, S.J. (2020). SARS-CoV-2 and bat RaTG13 spike glycoprotein structures inform on  
916 virus evolution and furin-cleavage effects. *Nat Struct Mol Biol*, 10.1038/s41594-020-0468-7.
- 917 Wu, X., Zhou, T., Zhu, J., Zhang, B., Georgiev, I., Wang, C., Chen, X., Longo, N.S., Louder, M.,  
918 McKee, K., *et al.* (2011). Focused evolution of HIV-1 neutralizing antibodies revealed by  
919 structures and deep sequencing. *Science* 333, 1593-1602.
- 920 Wu, Y., Wang, F., Shen, C., Peng, W., Li, D., Zhao, C., Li, Z., Li, S., Bi, Y., Yang, Y., *et al.*  
921 (2020). A noncompeting pair of human neutralizing antibodies block COVID-19 virus binding  
922 to its receptor ACE2. *Science* 368, 1274-1278.
- 923 Yang, A.S., and Honig, B. (1993). On the pH dependence of protein stability. *J Mol Biol* 231, 459-  
924 474.
- 925 Yuan, M., Wu, N.C., Zhu, X., Lee, C.D., So, R.T.Y., Lv, H., Mok, C.K.P., and Wilson, I.A.  
926 (2020). A highly conserved cryptic epitope in the receptor binding domains of SARS-CoV-2  
927 and SARS-CoV. *Science* 368, 630-633.

- 928 Yuan, Y., Cao, D., Zhang, Y., Ma, J., Qi, J., Wang, Q., Lu, G., Wu, Y., Yan, J., Shi, Y., *et al.*  
929 (2017). Cryo-EM structures of MERS-CoV and SARS-CoV spike glycoproteins reveal the  
930 dynamic receptor binding domains. *Nat Commun* 8, 15092.
- 931 Yurkovetskiy, L., Pascal, K.E., Tompkins-Tinch, C., Nyalile, T., Wang, Y., Baum, A., Diehl,  
932 W.E., Dauphin, A., Carbone, C., Veinotte, K., *et al.* (2020). SARS-CoV-2 Spike protein  
933 variant D614G increases infectivity and retains sensitivity to antibodies that target the receptor  
934 binding domain. *bioRxiv*, 10.1101/2020.07.04.187757.
- 935 Zhang, L., Jackson, C.B., Mou, H., Ojha, A., Rangarajan, E.S., Izard, T., Farzan, M., and Choe, H.  
936 (2020). The D614G mutation in the SARS-CoV-2 spike protein reduces S1 shedding and  
937 increases infectivity. *bioRxiv*, 2020.2006.2012.148726.
- 938 Zheng, S.Q., Palovcak, E., Armache, J.P., Verba, K.A., Cheng, Y., and Agard, D.A. (2017).  
939 MotionCor2: anisotropic correction of beam-induced motion for improved cryo-electron  
940 microscopy. *Nat Methods* 14, 331-332.
- 941 Zhou, P., Yang, X.L., Wang, X.G., Hu, B., Zhang, L., Zhang, W., Si, H.R., Zhu, Y., Li, B., Huang,  
942 C.L., *et al.* (2020a). A pneumonia outbreak associated with a new coronavirus of probable bat  
943 origin. *Nature* 579, 270-273.
- 944 Zhou, T., Teng, I.-T., Olia, A.S., Cerutti, G., Gorman, J., Nazzari, A., Shi, W., Tsybovsky, Y.,  
945 Wang, L., Wang, S., *et al.* (2020b). Structure-Based Design with Tag-Based Purification and  
946 In-Process Biotinylation Enable Streamlined Development of SARS-CoV-2 Spike Molecular  
947 Probes. *bioRxiv*, 2020.2006.2022.166033.  
948  
949

950 **Supplemental Video Legends**

951 Video S1. A side-view movie illustrating the trajectory of the 3D covariance described by  
952 eigenvector 0 in 3D variability analysis of individual spike at pH 5.5 (see Methods for a  
953 detailed description). A ratcheting motion of one NTD domain results in increased mobility  
954 of the corresponding RBD. A corresponding top view is presented in Video S2.

955 Video S2. A top-view movie illustrating the trajectory of the 3D covariance described by  
956 eigenvector 0 in 3D variability analysis of individual spike at pH 5.5 (see Methods for a  
957 detailed description). The RBD is up and alternates between two positions. A corresponding  
958 side view is presented in Video S1.

959 Video S3. A side-view movie illustrating the trajectory of the 3D covariance described by  
960 eigenvector 2 in 3D variability analysis of individual spike at pH 5.5 (see Methods for a  
961 detailed description). A ratcheting motion of one NTD domain results in increased mobility  
962 of the corresponding RBD. A corresponding top view is presented in Video S4.

963 Video S4. A top-view movie illustrating the trajectory of the 3D covariance described by  
964 eigenvector 2 in 3D variability analysis of individual spike at pH 5.5 (see Methods for a  
965 detailed description). The RBD alternates between up and down positions. A corresponding  
966 side view is presented in Video S3.

967 Video S5. pH-dependent domain movements in the SARS-CoV-2 spike and pH-switch refolding.

968



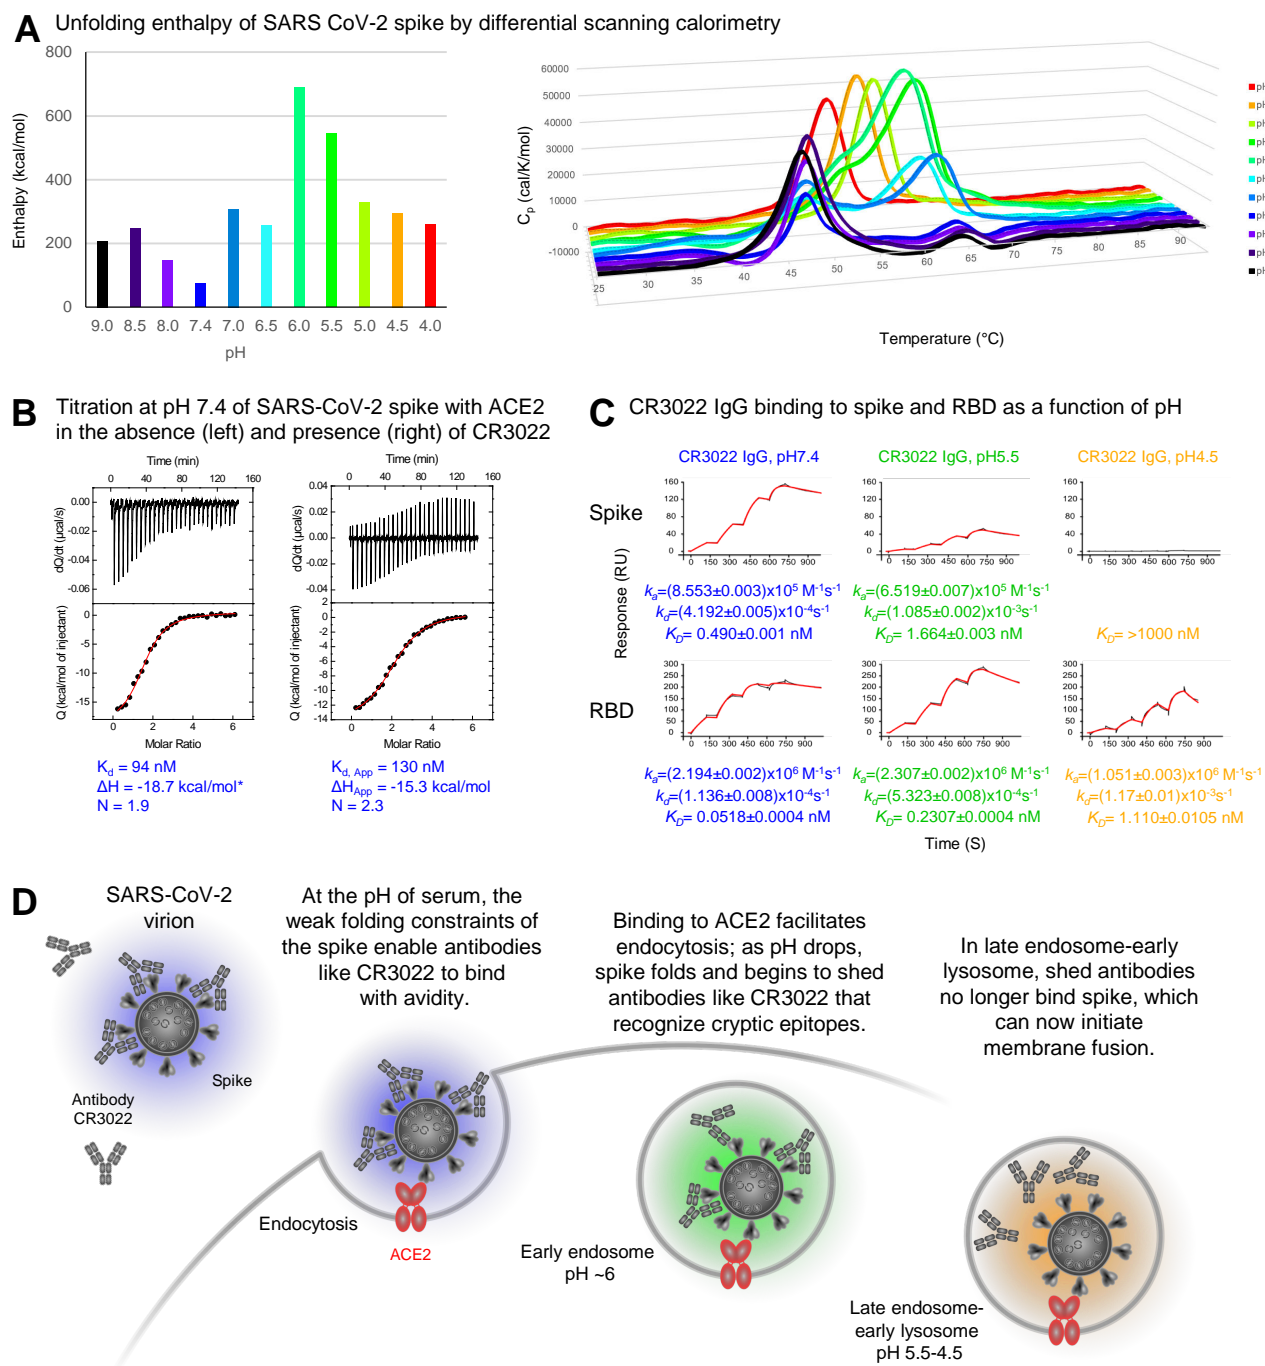

**Figure 1. SARS-CoV-2 Spike Is Partially Folded at Serological pH, Where It Binds ACE2 and CR3022, and More Folded at Lower pH, Where It Still Binds ACE2, but Not CR3022.** (A) Unfolding enthalpy of spike as measured by differential scanning calorimetry (DSC). Left, overall unfolding enthalpy measured as area under the curve (AUC) as a function of pH; at pH 7.4, the spike showed only ~10% the normalized unfolding enthalpy of the average globular protein. Right, unfolding enthalpy as a function of temperature. (B) Isothermal titration calorimetry at pH 7.4 of ACE2 recognizing spike (left) or spike previously titrated with Fab CR3022 (right). (C) Apparent affinities of spike (top) and real affinities of RBD (bottom) to CR3022 IgG as a function of pH as measured by SPR. (D) Schematic showing ACE2-dependent endosomal entry of SARS-CoV-2 and the pH-dependent shedding of antibodies like CR3022. See also Figures S1-S3.

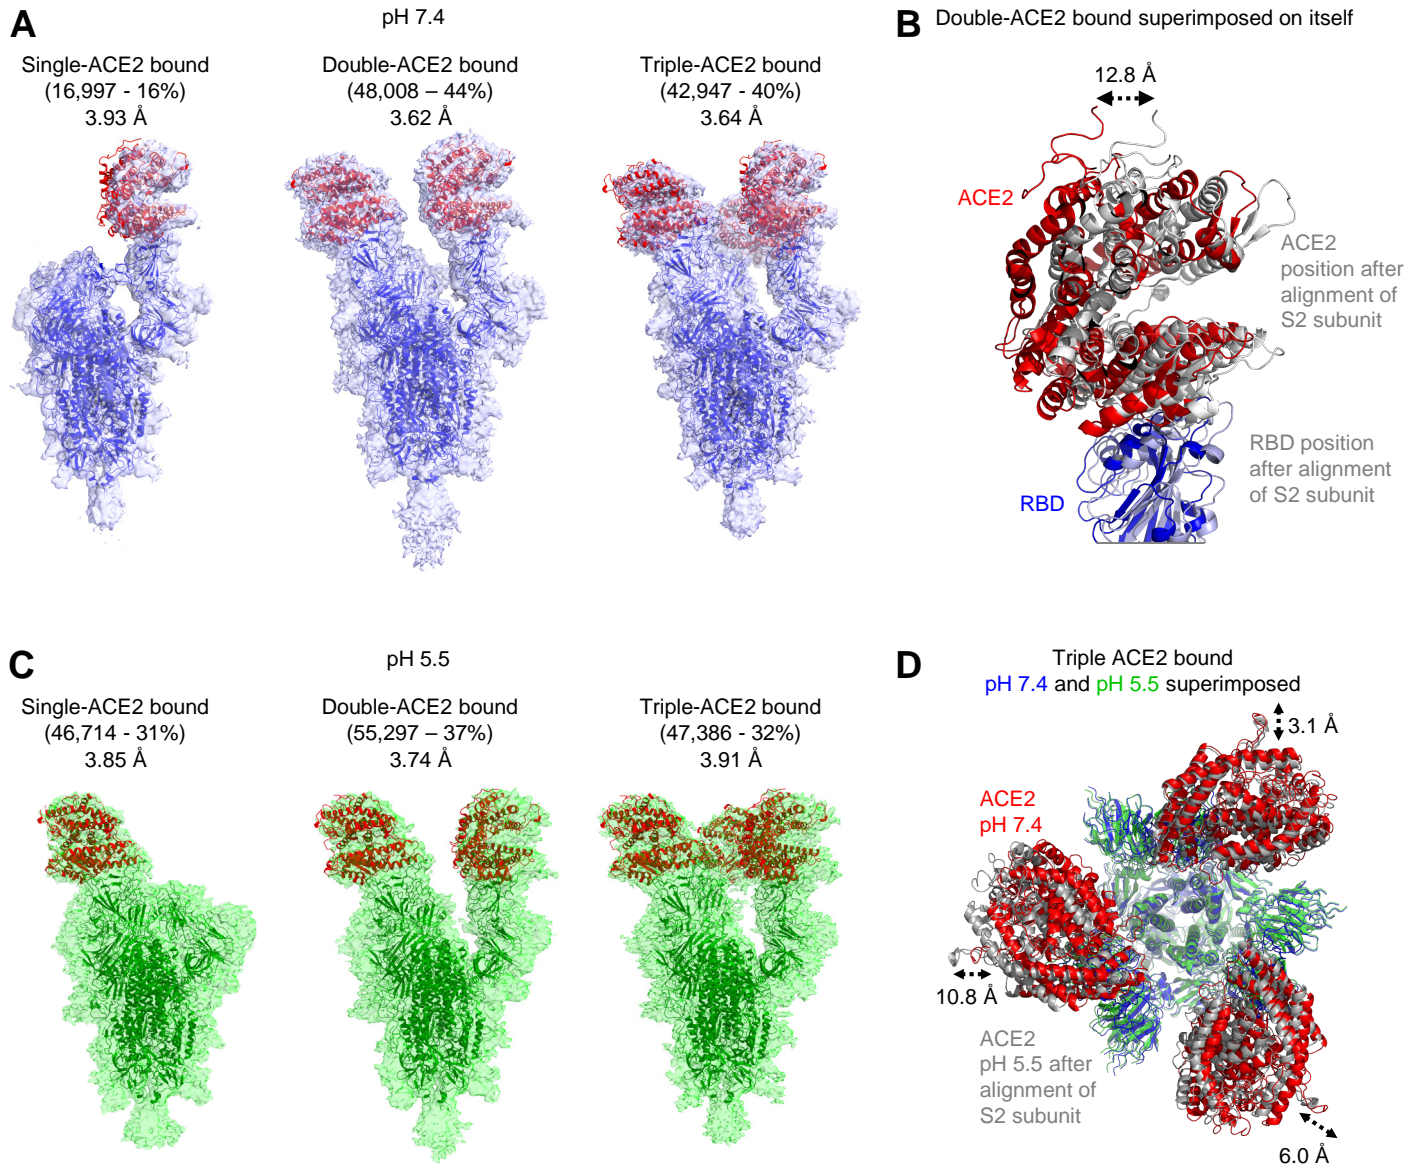

**Figure 2. Cryo-EM Structures of SARS-CoV-2 Spike with ACE2 Show Similar Stoichiometries at Serological and Endosomal pH.** (A) Cryo-EM structures of spike with single-, double-, or triple-bound ACE2 at serological pH. (B) Structural comparison of the two ACE2-RBD in the double ACE2-bound structure reveals different tilt angles resulting in as much as a 12.8 Å displacement as indicated. (C) Cryo-EM structure of spike and ACE2 at endosomal pH. (D) Comparison of triple ACE2-bound spikes at serological and endosomal pH. Structures were aligned by S2-subunit superposition and are displayed with the trimer perpendicular to the page and with spike colored according to pH and ACE2 colored red and gray for pH 7.4 and 5.5, respectively. Monomeric ACE2 was used as a ligand in all sample sets. See also Figure S4 and Table S1.

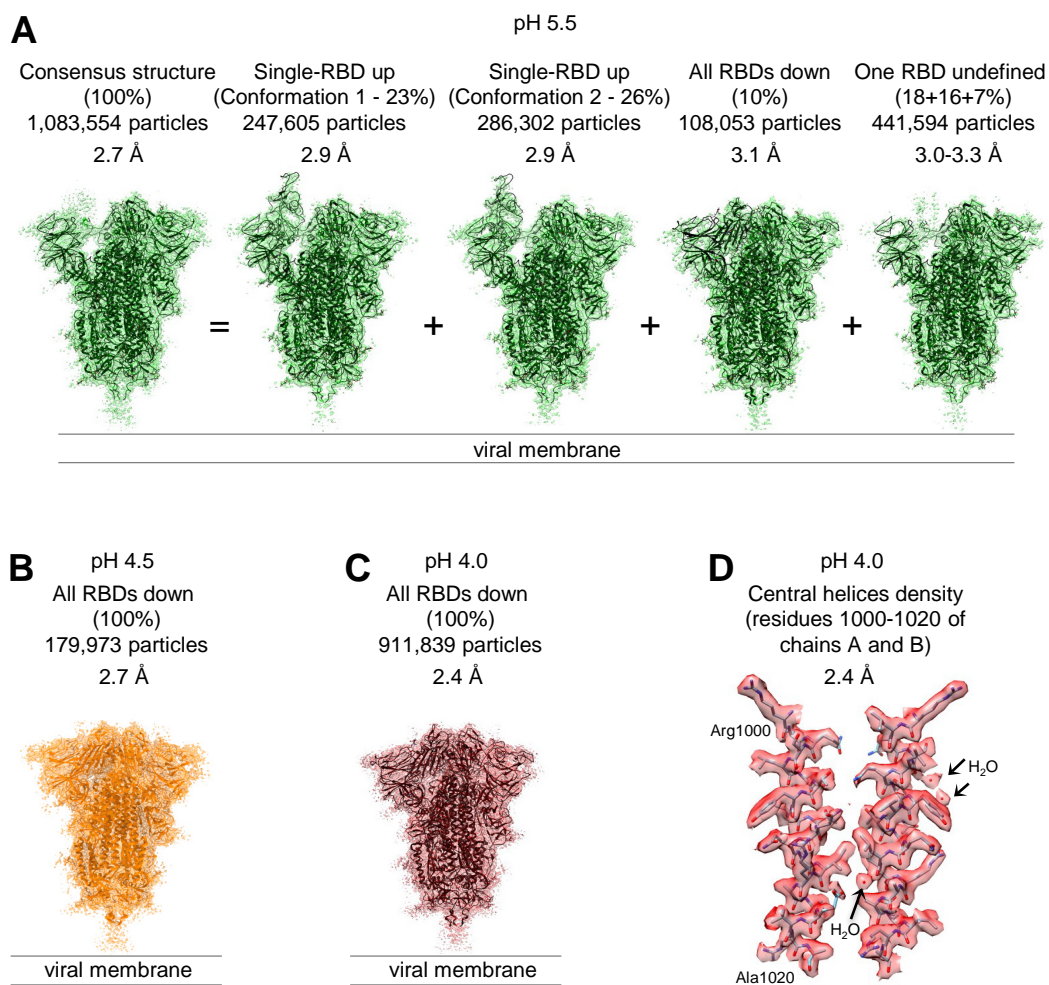

**Figure 3. Cryo-EM Analyses Reveal Lower pH to Reduce Spike-Conformational Heterogeneity Culminating in an All RBD-Down Conformation at pH 4.0.** (A) Structures at pH 5.5 with particle prevalence and resolution of determined structures. (B) Structure of spike at pH 4.5. (C) Structure of spike at pH 4.0. (D) Example of reconstruction density. A region at the central helices of the pH 4.0 structure is shown with well-defined water molecules. See also Figures S5-S6 and Tables S2 and S3.

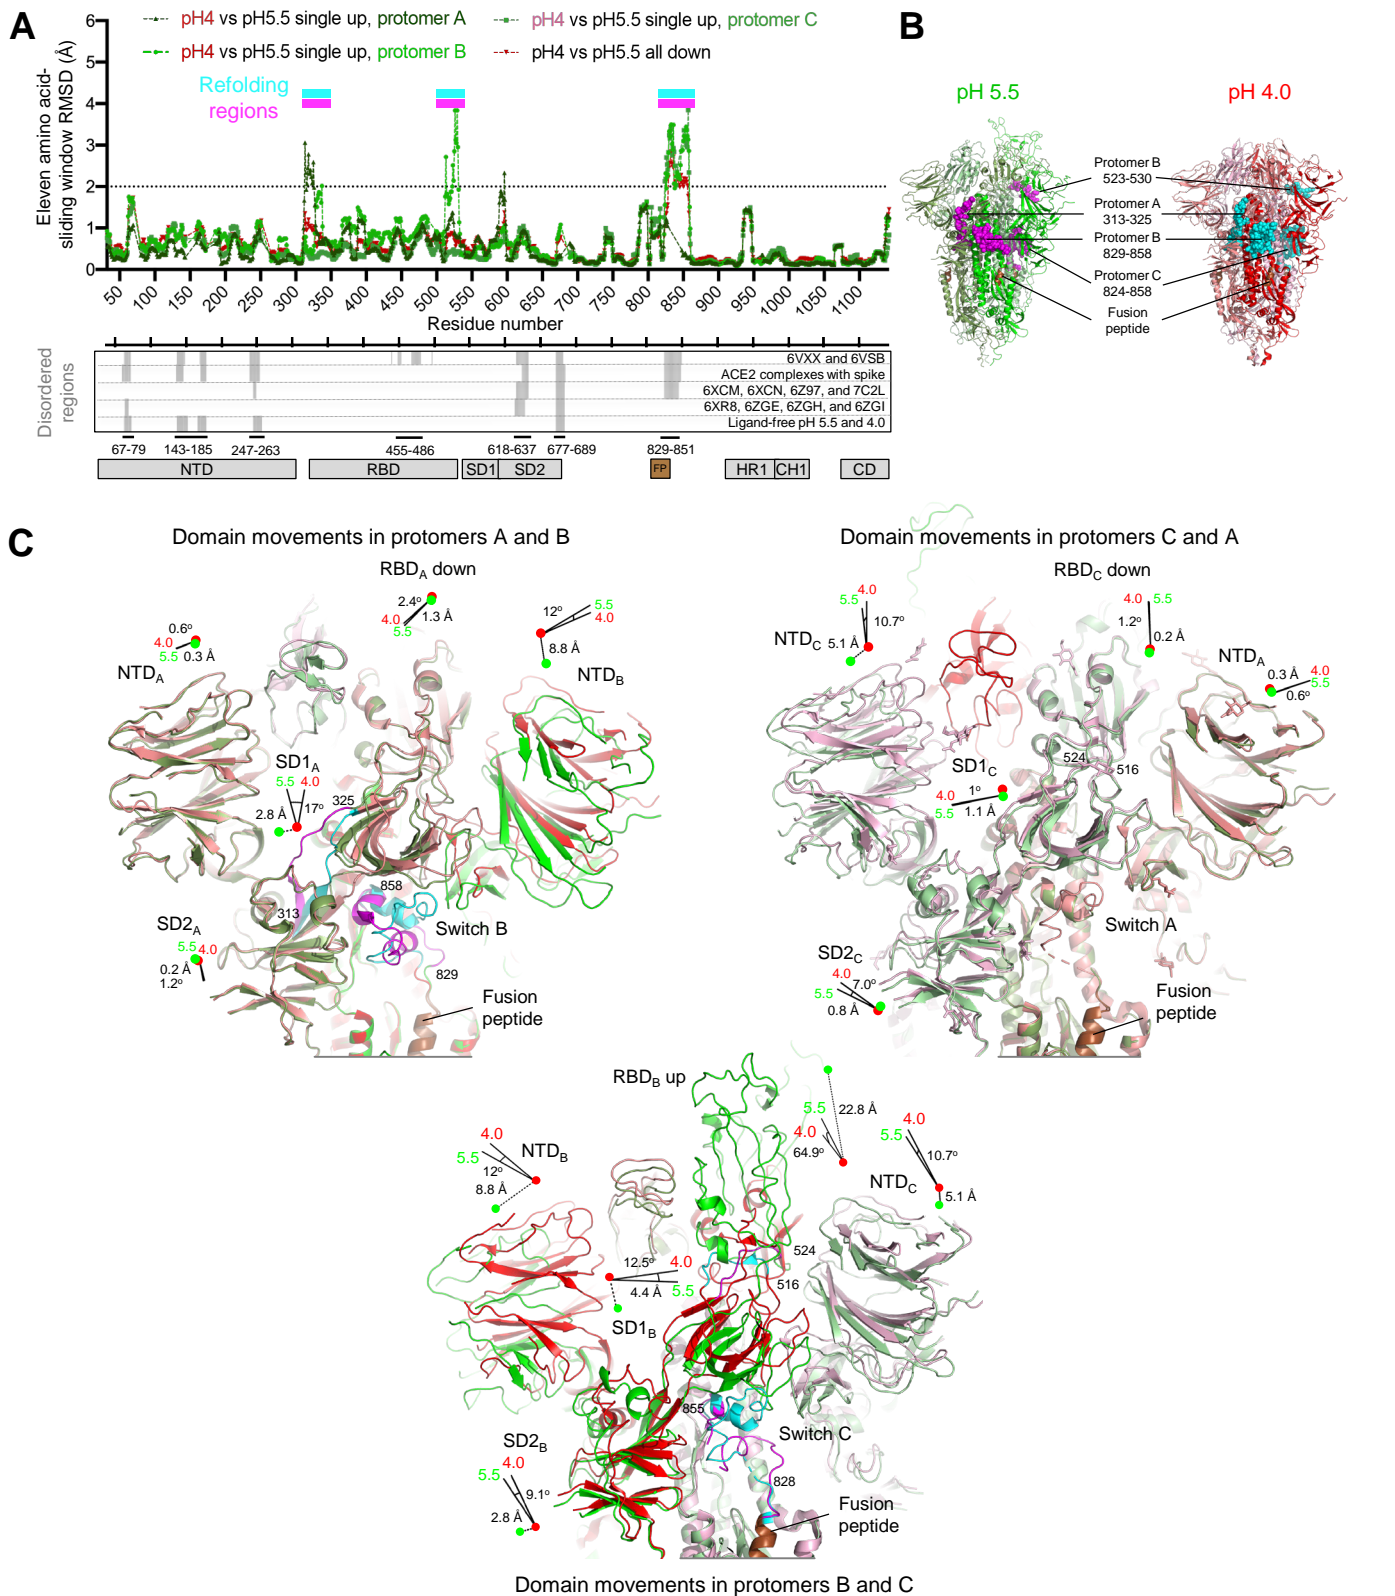

**Figure 4. A Switch Domain Mediates RBD Position.** (A) Identification of refolding regions through rmsd analysis with a 11-residue window (top) and comparison of disordered regions in cryo-EM structures (bottom). (B) Refolding regions identified by sliding-window rmsd analysis are highlighted on the pH 5.5 single-up and pH 4.0 structures as spheres and are colored magenta and cyan, respectively. Protomers A, B and C of the pH 5.5 structure are each colored smudge, green or pale green, and the corresponding protomers in the pH 4.0 structure are colored salmon, red or light pink, with fusion peptide colored brown. (C) Domain movements between pH 5.5 and 4.0. Three views are shown to depict the movements at the interfaces of protomers A-B, B-C and C-A. Extent and direction of rotation and displacement are indicated for each domain with vectors and colored dots. Refolding regions are labeled and colored as in (B). See also Figures S6-S7 and Table S4.

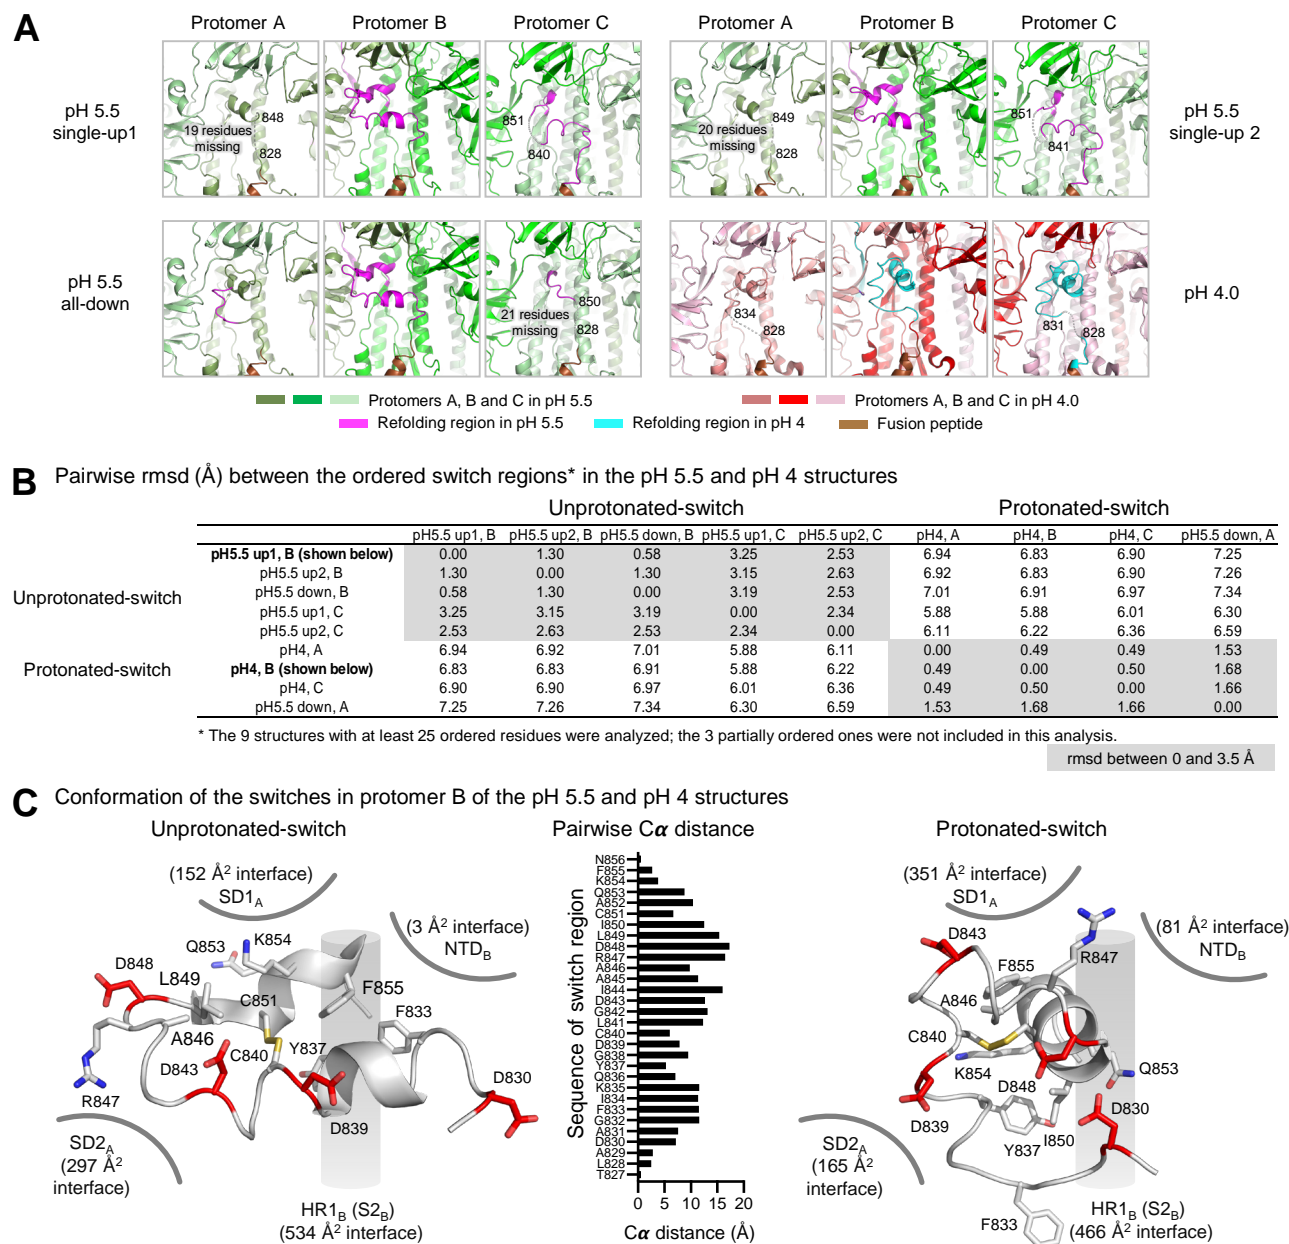

**Figure 5. The pH-Switch Domain.** (A) Switches in the pH 5.5 and pH 4.0 structures. The protomers and switches were colored as in Figure 4B. Disordered regions of the switches are shown as gray dashed lines and marked by flanking residue numbers. (B) Pairwise rmsd between switch regions (residues 824-858) from different protomers. Of the 12 protomers determined in this study, only 9 had at least 25 ordered residues and were included in this pairwise-rmsd analysis; rmsds of less than 3.5 Å shaded grey. Switch regions for SARS-CoV-2 spike at higher pH were recently described (Cai et al., 2020; Wrobel et al., 2020) – and these and switch regions from other coronaviruses are analyzed in Figure S7. (C) Comparison of the unprotonated and protonated switches. Key residues are shown in sticks representation, and Asp and Cys residues are colored red and yellow, respectively. Interactive surface areas with surrounding domains indicated. Pairwise C $\alpha$ -distances between switch residues is shown in the middle. See also Figures S6 and S7, and Tables S5.

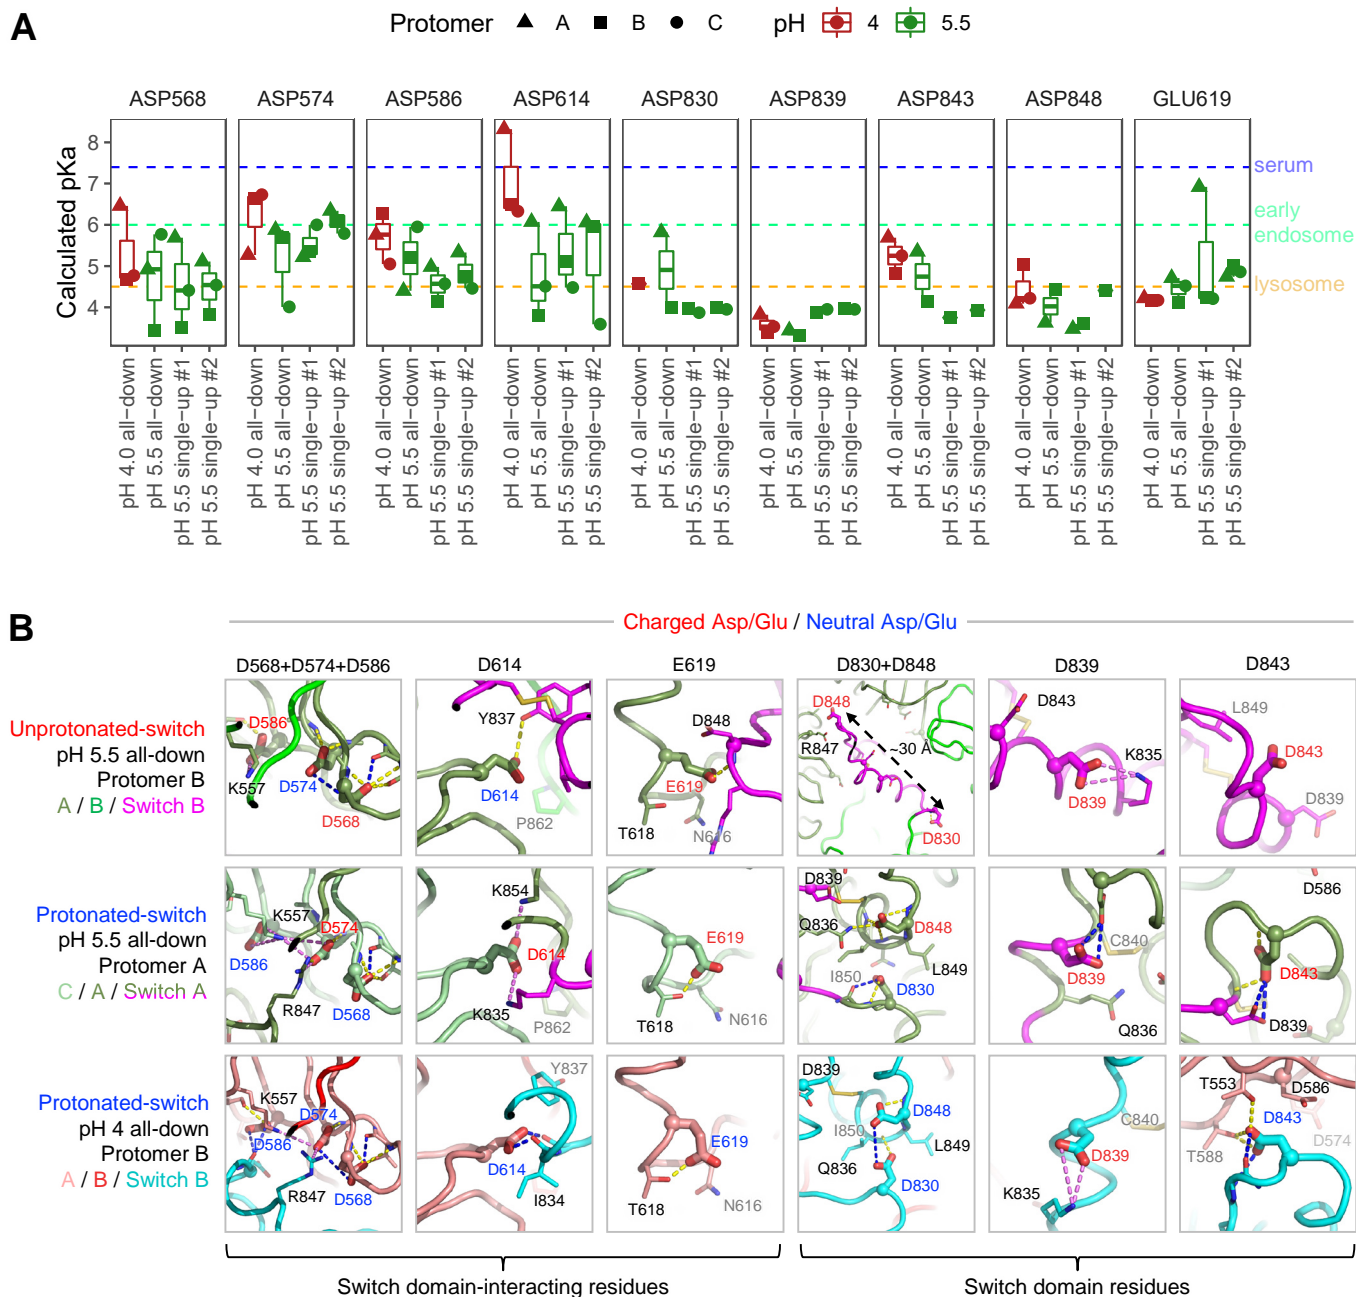

**Figure 6. pKa Calculations for the pH-Switch Domain.** (A) PROPKA-calculated pKas for pH-dependent switch domain residues in the pH 4.0 and 5.5 unliganded spike structures. pKas are plotted for titratable residues within and interacting with the 824-858 pH-dependent switch domain for in each structure, disordered regions excluded. Typical pH values for serum (7.4), early endosome (6.0) and late endosome (4.5) are indicated by dashed lines, each colored as in Figure 1A. (B) Close-up views of Asp/Glu residues in (A) from the pH 4.0 and pH 5.5 structures depict changes in chemical environment for each residue between conformations. View angles with respect to superposed structures are the same within each residue column. Switch domain and surrounding protomers are colored as indicated at left. Highlighted residues are shown as thick sticks with labels colored based on pKa-based dominant protonation state at the structure pH: charged Asp/Glu in red, and neutral (protonated) Asp/Glu in blue. Residues within 4 Å are shown as thin sticks. Dashed lines indicate hydrogen bonds (yellow) or salt bridge interactions (violet), with hydrogen bonds requiring carboxylic acid group protonation shown in blue. The pKa shifts between unprotonated- and protonated-switch conformations define a pH-dependent stability gradient that favors the protonated-switch form at lower pHs (Yang & Honig, 1993). However, other factors such as global conformational constraints may also play a role in favoring one conformation over another. See also Figure S7.

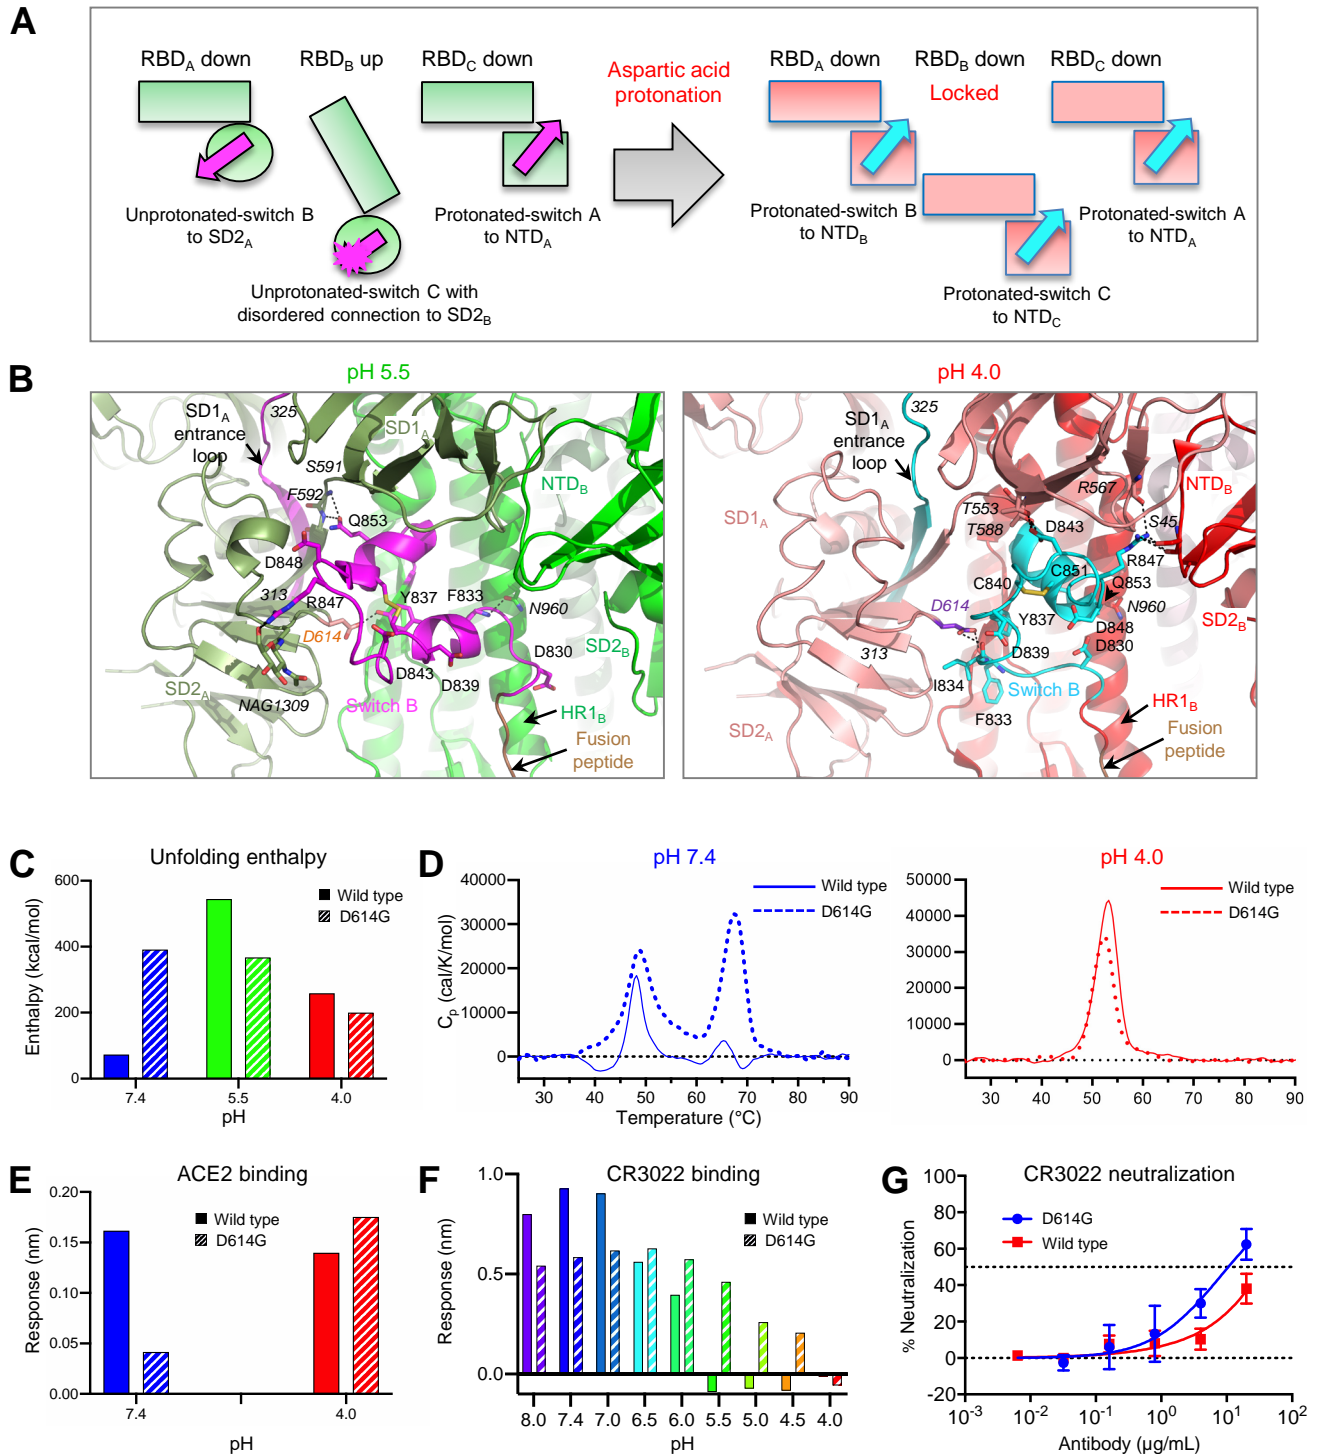

**Figure 7. Aspartic Acid Protonation at Low pH Refolds Switch Domain Locking RBDs in the Down Position; an Asp614Gly Variant Alters SD2-Switch Interactions Leading to Altered ACE2 Interactions and Modestly Impaired Conformational Masking.** (A) Schematic of the pH-switch locking of RBD in the down position. (B) Details of the pH-switch domain. Key residues, including Arg847, Gln853, and Tyr837, switch interactive partners upon refolding. Asp614 is colored orange and purple blue at pH 5.5 and pH 4.0, respectively. Surrounding residues interacting with the switch are labeled in italics, and hydrogen bonds are shown as dashed lines. (C) Unfolding enthalpy measured by DSC for the spike and its Asp614Gly variant at pH 7.4, 5.5, and 4.0. (D) Melting curves at pH 7.4 (left) and 4.0 (right). (E) BLI measurements of ACE2 binding to the spike and its Asp614Gly variant at pH 7.4 and 4.0. (F) BLI measurements of CR3022 binding to the spike and its D614G variant at different pHs. (G) Pseudovirus neutralization of SARS-CoV-2 and its D614G variant by antibody CR3022.
